# 1 **Gamma-cycle duration predicts instantaneous** 2 **amplitude, spike rate and synchrony in macaque V1.**

3 Georgios Spyropoulos,<sup>1</sup> Jarrod Robert Dowdall,<sup>1,2</sup> Marieke Louise Schölvinck,<sup>1</sup> Conrado  
4 Arturo Bosman,<sup>3,4</sup> Bruss Lima,<sup>5,6</sup> Alina Peter,<sup>1,2</sup> Irene Onorato,<sup>1,2</sup> Johanna Klön-Lipok,<sup>1,5</sup>  
5 Rasmus Roese,<sup>1</sup> Sergio Neuenschwander,<sup>5,7</sup> Wolf Singer,<sup>1,5,8</sup> Martin Vinck,<sup>1,9</sup> Pascal  
6 Fries<sup>1,3,9,10,\*</sup>

7 <sup>1</sup>Ernst Strüngmann Institute (ESI) for Neuroscience in Cooperation with Max Planck Society, 60528  
8 Frankfurt, Germany

9 <sup>2</sup>International Max Planck Research School for Neural Circuits

10 <sup>3</sup>Donders Institute for Brain, Cognition and Behaviour, Radboud University, 6525 EN Nijmegen, the  
11 Netherlands

12 <sup>4</sup>Swammerdam Institute for Life Sciences, Center for Neuroscience, Faculty of Science, University of  
13 Amsterdam, 1098 XH Amsterdam, the Netherlands

14 <sup>5</sup>Max Planck Institute for Brain Research, 60438 Frankfurt, Germany

15 <sup>6</sup>Carlos Chagas Filho Institute of Biophysics, Federal University of Rio de Janeiro, 21941-902 Rio de  
16 Janeiro, Brazil

17 <sup>7</sup>Brain Institute, Federal University of Rio Grande do Norte, 59056-450 Natal, Brazil

18 <sup>8</sup>Frankfurt Institute for Advanced Studies, 60438 Frankfurt, Germany

19 <sup>9</sup>These authors contributed equally to this work

20 <sup>10</sup>Lead Contact

21 \*Correspondence: [pascal.fries@esi-frankfurt.de](mailto:pascal.fries@esi-frankfurt.de)

## 22 **SUMMARY**

23 Communication among visual cortical areas depends on gamma oscillations. Respective  
24 gamma cycles vary substantially in amplitude and duration, yet it is unclear how those  
25 fundamental parameters relate to each other and to spiking activity. We recorded local-field-  
26 potentials (LFPs) and spiking activity from awake macaque area V1 and detected amplitude,  
27 duration and spiking activity per gamma cycle. Longer durations predicted larger amplitudes and  
28 stronger spike synchrony, yet lower spike rates. These findings suggest that spontaneous  
29 gamma-variability reflects inhibitory mechanisms that reduce spike rates, increase  
30 synchronization, and prolong the cycle duration. The classical LFP power-spectrum, estimated  
31 on longer time scales, was most strongly predicted from *how often* certain gamma-cycle  
32 durations occurred, rather than by their associated instantaneous amplitudes.

## 33 **INTRODUCTION**

34 Gamma oscillations are a prominent feature of the activated cortex and likely contribute to  
35 stimulus processing (Cardin et al., 2009; Gray et al., 1989; Siegle et al., 2014), interareal  
36 communication (Bosman et al., 2012; Buschman and Miller, 2007; Colgin et al., 2009; Gregoriou  
37 et al., 2009; Grothe et al., 2012; Rohenkohl et al., 2018; Womelsdorf and Fries, 2007), attention  
38 (Bichot et al., 2005; Fries et al., 2001), spatial memory (Bieri et al., 2014; Zheng et al., 2016)  
39 and working memory (Pesaran et al., 2002). Many aspects of the gamma rhythm are,  
40 nevertheless, poorly understood. In particular, assumptions concerning its stationarity are often  
41 violated. Recent work suggests that gamma amplitude and frequency fluctuate considerably  
42 over time (Burns et al., 2011; Lowet et al., 2018; Lowet et al., 2016; Lundqvist et al., 2016) and  
43 cortical space (Lima et al., 2010; Lowet et al., 2017; Ray and Maunsell, 2010). This is  
44 particularly important for theories that implicate gamma rhythms in interareal communication  
45 (Akam and Kullmann, 2012; Fries, 2015; Palmigiano et al., 2017).

46 The non-stationary character of gamma oscillations is a consequence of the network  
47 mechanism of gamma generation. An influential network model of gamma, the pyramidal  
48 interneuronal network gamma (PING) model posits that gamma originates from the interplay of  
49 excitation and inhibition (Börgers and Kopell, 2003; Buzsáki and Wang, 2012; Tiesinga and  
50 Sejnowski, 2009; Tiesinga et al., 2001; Traub et al., 1997; Whittington et al., 2000). The  
51 interaction of excitation and inhibition is, itself, a ubiquitous feature of cortical circuits, and is  
52 highly non-linear. Specifically, the amount of excitation in a given gamma cycle should  
53 determine the duration of the subsequent inhibition: Stronger bouts of excitation should lead to  
54 gamma cycles of larger amplitude, which should be followed by longer inhibition and  
55 correspondingly longer gamma cycle duration (Okun and Lampl, 2008; Shu et al., 2003; Traub  
56 et al., 1996; Wehr and Zador, 2003; Whittington et al., 1995). The predicted positive correlation  
57 between gamma cycle amplitudes and durations has actually been reported in rodent  
58 hippocampus (Atallah and Scanziani, 2009).

59 The rodent hippocampus has been the main model system from which empirical support for the  
60 PING model derives (Atallah and Scanziani, 2009; Bragin et al., 1995; Csicsvari et al., 2003;

61 Mann et al., 2005). Another prominent model system, in which gamma oscillations have been  
62 extensively studied, is primate visual cortex, and particularly macaque area V1. Here, much  
63 work has been devoted to gamma synchronization between V1 and higher areas V2 and V4, its  
64 role in interareal communication and its modulation by attention (Bastos et al., 2015; Bosman et  
65 al., 2012; Grothe et al., 2012; Jia et al., 2013a; Lowet et al., 2018; Lowet et al., 2016; Roberts et  
66 al., 2013; Rohenkohl et al., 2018). If in this system, too, gamma-cycle amplitudes and durations  
67 were correlated, this could provide an important link to models of gamma that are based on  
68 rodent electrophysiology. A mechanistic relationship between instantaneous gamma-cycle  
69 amplitude and duration may also contribute to the emergence of gamma synchronization: A  
70 strong, synchronous bout of excitation in a pre-synaptic group of neurons could induce a long  
71 gamma-cycle both in this pre-synaptic and a post-synaptic group, due to subsequent inhibition.  
72 This would lead to coherent fluctuations in instantaneous frequency between these two  
73 neuronal groups and thereby aid their gamma synchronization. This mechanisms could be at  
74 play both within (Lowet et al., 2017) and between (Roberts et al., 2013) areas.

75 There is some evidence that gamma synchronization in awake macaque V4 is generated by an  
76 excitatory-inhibitory balance, similar to rodent hippocampus (Vinck et al., 2013a). However, the  
77 evidence for the relation between gamma amplitude and frequency, i.e. the inverse of the  
78 gamma cycle duration, so far suggests no consistent relationship (Jia et al., 2013b). Many  
79 recent studies in macaques, primarily in V1, have identified a multitude of contextual and top-  
80 down factors that influence the amplitude and frequency of gamma oscillations. The amplitude  
81 and/or frequency of gamma are known to be modulated by visual contrast (Jia et al., 2013b;  
82 Ray and Maunsell, 2010; Roberts et al., 2013), the relation between stimulus orientation and  
83 neuronal orientation preference (Jia et al., 2013b; Lima et al., 2010), the size of visual stimuli  
84 (Gieselmann and Thiele, 2008; Peter et al., 2019), stimulus repetition (Brunet et al., 2014), time  
85 after stimulus onset (Jia et al., 2011), eye movements (Bosman et al., 2009; Lowet et al., 2016),  
86 and attention (Bosman et al., 2012). Some of these factors enhance both gamma amplitude and  
87 frequency, whereas some enhance one of them and reduce the other. For example, the size of  
88 visual stimuli is positively correlated with the amplitude and negatively correlated with the  
89 frequency of gamma (Gieselmann and Thiele, 2008; Peter et al., 2019), in accordance with the  
90 findings reported in rodent hippocampus (Atallah and Scanziani, 2009). However, the contrast  
91 of visual stimuli is positively correlated with both gamma amplitude and frequency (Jia et al.,  
92 2013b; Ray and Maunsell, 2010; Roberts et al., 2013). Thus, while some stimulus factors lead  
93 to positive correlations between gamma cycle amplitudes and durations, compatible with the  
94 abovementioned evidence from rodents, others lead to negative correlations.

95 The stimulus factors outlined above do not exclude the possibility that the fundamental  
96 mechanism of gamma generation in awake macaque visual cortex produces a positive  
97 correlation between gamma-cycle amplitudes and durations. We addressed this question by  
98 recording local-field-potentials (LFPs) and spiking activity from awake macaque area V1. We  
99 developed a method to detect the amplitude and duration per gamma cycle, which circumvented  
100 major problems of previous methods and allowed us to analyze the relationship of a gamma-  
101 cycle's duration with its amplitude, and with spike rates and spike-field coherence.

## 102 RESULTS

103 We recorded local field potentials (LFPs) and spiking activity from primary visual cortex (V1) of  
104 several macaque monkeys (see Methods). The monkeys performed a fixation task, while drifting  
105 gratings or uniform color surfaces were presented. Figure 1A shows an example trial of  
106 broadband LFP recorded during the presentation of a full-screen drifting grating. The trial-  
107 average spectra of absolute power (Figure 1B) and of power change relative to pre-stimulus  
108 baseline (Figure 1C) reveal very strong visually induced gamma oscillations. The time-  
109 frequency analysis (Figure 1D) shows that this induced gamma is sustained for the duration of  
110 stimulation. Figure 1F-I shows similar results for visual stimulation with a colored surface (Peter  
111 et al., 2019; Shirhatti and Ray, 2018).

112 For these data, we investigated the relationship between gamma-cycle amplitude and duration.  
113 We first performed this analysis in a way that followed as closely as possible the approach used  
114 by (Atallah and Scanziani, 2009) for data from awake freely-moving rats. One difference was  
115 that we focused on the visual stimulation period, whereas Atallah and Scanziani used the  
116 ongoing LFP during anesthesia or wakefulness. In short, LFP signals were band-pass filtered  
117 effectively between 20 and 100 Hz (Figure 2A; see Methods for details), and LFP segments that  
118 had relatively high power in the gamma-frequency range were selected. For these selected LFP  
119 segments, gamma peaks and troughs were identified as, respectively, the local maxima and  
120 minima of the filtered LFP. The cycle amplitude was determined as the voltage difference  
121 between each peak and its subsequent trough, and the cycle duration as the interval between  
122 each peak and its subsequent peak (Figure 2B). For each gamma cycle, we thus obtained two  
123 values, namely the cycle amplitude and the cycle duration. For each LFP channel separately,  
124 we then computed the Pearson correlation coefficient between same-cycle amplitude and  
125 duration values, across all gamma cycles detected for a given recording site in a given dataset  
126 (see Methods) (Figure 2C, red bars). In addition, the correlation coefficient was computed  
127 between the amplitude of a given cycle and the duration of the preceding cycle (Figure 2C,  
128 white bars left of red bars), and also between the amplitude of a given cycle and the duration of  
129 the succeeding cycle (Figure 2C, white bars right of red bars). We averaged these correlations  
130 across recording sites within a given dataset. Across datasets, the correlation between the  
131 amplitude and duration of the same cycle was significantly positive (Figure 2C red bars;  $p < 5 \cdot 10^{-5}$ ,  
132 t-test;  $p < 0.05$ , two-sided non-parametric permutation test across datasets), whereas the  
133 correlations between the amplitude of one cycle and the duration of either the preceding or  
134 succeeding cycle were not significant (Figure 2C white bars for preceding cycle:  $p = 0.28$ , t-test;  
135 white bars for succeeding cycle:  $p = 0.56$ , t-test; for both cases  $p > 0.05$ , two-sided non-parametric  
136 permutation test across datasets). We repeated those analyses for the Spearman instead of the  
137 Pearson correlation and found those values to be almost identical, which is in agreement with  
138 (Atallah and Scanziani, 2009).

139 We wondered whether cycle amplitude and duration were also correlated during the pre-  
140 stimulus baseline period. During this period, there was no detectable gamma peak in the LFP  
141 power spectrum, but rather a characteristic  $1/f^n$  trend in the gamma-frequency range

142 (Figures 1B and 1G). Nevertheless, the analysis method used above (Atallah and Scanziani,  
143 2009) resulted in the detection of a substantial number of “gamma cycles”, i.e. cycles with an  
144 instantaneous frequency in the gamma range. We did not expect that for this period, the  
145 correlation between gamma-cycle duration and amplitude would be as strong as for the visual  
146 stimulation period, in which gamma oscillations were very strong. To our surprise, the  
147 correlation between cycle amplitude and duration in the pre-stimulus period was in fact higher  
148 than in the visual stimulation period (Figure 2D red bars;  $p < 5 \times 10^{-5}$ , t-test). A sufficiently long pre-  
149 stimulus period was available in only a subset of the datasets, yet the correlation was higher for  
150 each of them. Thus, a very strong correlation between cycle-by-cycle amplitude and duration  
151 existed in the absence of a detectable gamma peak, when using the same approach as  
152 previously used in rodent hippocampus (Atallah and Scanziani, 2009).

153 It is conceivable that in the baseline period, fluctuations in the gamma-frequency range reflect a  
154 rhythmic gamma component that remains undetected in the power spectrum. We therefore  
155 investigated the relationship between gamma-cycle amplitude and duration for the case of  
156 synthetic noise signals, in which no rhythmic gamma component is present. We generated  
157 synthetic noise signals having a power spectrum with a  $1/f^n$  shape, where  $n$  ranged between 0  
158 (white noise) and 2 (Brownian noise) (Figure 2F). We then analyzed these signals with the  
159 same method as used for the LFP signals, and observed a highly significant positive correlation  
160 between the amplitude and duration of individual deflections in the gamma-frequency range.  
161 The magnitude of this correlation increased as a function of the  $1/f^n$  slope of the underlying  
162 power spectrum (Figure 2G). Thus, noisy fluctuations in a signal without rhythmic components  
163 can give rise to a strong positive correlation between the amplitude and duration of “gamma-  
164 cycles”. Note that in this case, the “gamma rhythmicity” is due to band-pass filtering (Figure 2E).  
165 This relationship should hold even for a random-walk process, where the magnitudes of  
166 successive steps (i.e. increments or decrements in the signal) are independent of each other  
167 and follow a normal distribution with zero mean. In this case, any reversal of direction will  
168 produce a peak or a trough. The peak-to-trough distance defines the duration of a “cycle” as the  
169 number of steps. The greater this number, the greater the expected amplitude of the respective  
170 “cycle”, because it is composed of a larger number of steps in the same direction, and because  
171 steps in a given direction are always drawn from the same distribution, namely the positive or  
172 negative half of the normal distribution.

173 To address this problem, we developed a different method to detect the instantaneous  
174 amplitude and duration of a gamma cycle (Figure 3, see Methods for details). This method was  
175 designed to prevent the detection of peaks and troughs due to noisy fluctuations. In addition, it  
176 was designed to circumvent problems related to band-pass filtering. Specifically, band-pass  
177 filtering creates dependencies between voltage values across time points, and can transform  
178 transient, non-oscillatory deflections into rhythmic events. The first step of our method was to  
179 compute the Hilbert transform on the broadband LFP-signal (i.e. without band-pass filtering in  
180 the gamma-frequency range). Based on the Hilbert transform, we extracted the phase of the  
181 analytic signal (Figure 3B) and computed the first temporal derivative of the unwrapped phase  
182 to obtain the angular velocity (Figure 3C). Data segments that contained an angular velocity



183 below zero (phase slips) were excluded from further analysis. The absence of such phase slips  
184 and thereby the presence of a stable positive angular velocity suggests that the signal is  
185 dominated by one rhythm. In the visual stimulation period, we detected many data segments  
186 fulfilling this criterion, and the dominating rhythm was in the gamma-frequency range  
187 (Figures 3A-3C). By contrast, very few segments were detected in the pre-stimulus period. We  
188 then used the analytic signal to determine the peaks and troughs of the gamma cycles.  
189 Specifically, we identified gamma peaks by first detecting negative-to-positive zero crossings in  
190 the phase of the analytic signal. For each of these crossings, we then identified the nearest local  
191 maximum in the LFP signal (Figure 3D). Likewise, gamma troughs were identified by detecting  
192 positive-to-negative zero crossings and identifying nearby local minima. Using the detected  
193 gamma peaks and troughs, we then determined the gamma-cycle amplitude and duration. To  
194 obtain estimates of gamma-cycle amplitude and duration with the maximum attainable temporal  
195 resolution, we divided each gamma cycle into “half-cycles”: The first half-cycle comprised the  
196 data segment from the trough to the peak, and the second half-cycle from the peak to the  
197 trough. For each half-cycle, amplitude was defined as the difference between the respective  
198 peak and trough, and duration was defined as the corresponding time interval. For each  
199 detected half-cycle, we thus obtained an amplitude and duration value. In summary, this revised  
200 method avoided filtering in the gamma band and focused on data segments dominated by one  
201 rhythm, which in our datasets was the gamma rhythm.

202 In addition, we aimed at excluding correlations between cycle amplitude and duration that could  
203 be explained by external factors, like stimulation. Figures 1E and 1J illustrates such stimulus-  
204 related correlation by showing time courses of gamma-cycle amplitudes (blue) and durations  
205 (red) as a function of time after stimulus onset. For stimulation with a grating, amplitudes and  
206 durations both increased with time. By contrast, for stimulation with a colored surface,  
207 amplitudes decreased while durations increased. Such post-stimulus dynamics would lead to  
208 substantial correlations, if correlations were calculated across all cycles, and the examples  
209 show that these correlations could be positive or negative. We aimed at eliminating such  
210 extrinsic effects, to isolate as much as possible the correlation between amplitude and duration  
211 that is due to the fundamental mechanisms underlying gamma-rhythm generation. Therefore,  
212 we computed correlations, across trials, separately for each time point after stimulus onset and  
213 then averaged them over post-stimulus time (see Methods for details). We quantified the  
214 correlation as the Spearman correlation coefficient, because this avoids assumptions about  
215 underlying distributions and about the linearity of their relation, and was found to be similar to  
216 the Pearson correlation in these data (see above) and the previous study (Atallah and  
217 Scanziani, 2009). Using this approach, amplitudes and durations of gamma half-cycles were  
218 positively correlated in all tested datasets (Figure 4A; red bars;  $p=0.006$ , t-test;  $p<0.05$ , two-  
219 sided non-parametric permutation test across datasets). Note that the magnitude of these  
220 correlations was, on average, substantially lower than the one observed with the previously  
221 employed method. Thus, amplitude and duration were positively correlated for cycles of visually  
222 induced gamma in the awake macaque, and this correlation was not due to noise, progressive  
223 changes in gamma over time after stimulus onset, or band-pass filtering. These results are  
224 consistent with the notion that similar mechanisms might underlie gamma rhythm generation in

225 awake macaque V1 and rodent hippocampus. In addition, we found no consistent pattern  
226 across datasets in the correlation between the instantaneous amplitude of the current half-cycle  
227 and the duration of the previous or the subsequent half-cycles (Figure 4A; white bars for  
228 preceding cycle:  $p=0.5$ , t-test; white bars for succeeding cycle:  $p=0.35$ , t-test; for both cases  
229  $p>0.05$ , two-sided non-parametric permutation test across datasets). Similar results were  
230 obtained for full rather than half cycles (Figure S1A; red bars;  $p=0.011$ , t-test;  $p<0.05$ , two-sided  
231 non-parametric permutation test across datasets; white bars for preceding cycle:  $p=0.13$ , t-test;  
232 white bars for succeeding cycle:  $p=0.9$ , t-test; for both cases  $p>0.05$ , two-sided non-parametric  
233 permutation test across datasets).

234 The last paragraph aimed at excluding correlations due to slow (slower than cycle-by-cycle)  
235 post-stimulus dynamics. Yet, such correlations might as well be due to other slow dynamics e.g.  
236 due to drifts or slow oscillations in the monkey's state, or to stimulus repetition. We investigated  
237 the influences of slower dynamics by computing correlation coefficients for up to ten preceding  
238 and succeeding half-cycles (Figure 4B). Some datasets showed dynamics on the temporal  
239 scale of few half-cycles (Figure 4B, left), others on the scale of multiple half-cycles (Figure 4B,  
240 middle and right). For example, the right panel in Figure 4B shows a long-lasting negative trend  
241 punctuated by a small positive value for the instantaneous correlation. By contrast, the middle  
242 panel shows a positive trend peaking at zero lag. The potential sources of those longer-time-  
243 scale correlations are manifold. This includes for the lagged correlations the post-stimulus  
244 dynamics, but likely other unknown sources as well. There is no obvious way to remove them  
245 explicitly, like we did for the influence of post-stimulus dynamics on the instantaneous  
246 correlation. Therefore, we removed the influences of slower dynamics globally through a  
247 regression analysis: As above, we first computed the half-cycle amplitude and duration for each  
248 time point after stimulus onset. For each half-cycle, we then predicted the amplitude value of the  
249 ongoing half-cycle from the amplitude values of the previous and next half-cycle, by using a  
250 least squares approach (see Methods). We used the same procedure for half-cycle duration  
251 values. This was done for each point after stimulus onset separately, and by using all the  
252 amplitude and duration values across trials (for that time point). From these regression  
253 analyses, we then obtained residual values of amplitude and duration for each half-cycle. These  
254 residual values measured the extent to which the amplitude or duration in the ongoing half-cycle  
255 was greater or smaller than in the surrounding half-cycles, and thereby departed from slower  
256 trends. We then computed the correlation between the regression residuals for amplitude and  
257 duration, in the same way as described above. On average across datasets, the resulting  
258 correlation (Figure 4C; red bars;  $p=0.0023$ , t-test;  $p<0.05$ , two-sided non-parametric permutation  
259 test across datasets) was comparable to the correlation between raw amplitude and duration  
260 (Figure 4A). This indicates that it is unlikely that the positive correlation between gamma  
261 amplitude and duration was due to within- or across-trial trends on a longer timescale. Rather,  
262 this finding suggests that the correlation was due to cycle-by-cycle fluctuations in amplitude and  
263 duration. Again, similar results were obtained for full rather than half cycles (Figure S1B; red  
264 bars;  $p=0.008$ , t-test).

265 We performed an additional analysis to address the issue of non-stationary fluctuations over  
266 longer time-scales or trials, by using an autoregressive (AR) model of the LFP data. An AR  
267 model captures the variance and auto-correlation of the LFP and can then be used to generate  
268 surrogate time series without non-stationary fluctuations in cycle amplitude and duration on a  
269 slower time-scale. Figure S2 illustrates this for the dataset from Figures 1A-1E. The AR model  
270 accurately captured the power spectrum (Figure S2B), but did not replicate slower dynamics in  
271 gamma cycle amplitudes or durations (Figure S2C, D, compare to Figure 1D, E). We analyzed  
272 the correlations between half-cycle amplitudes and durations in the surrogate data generated by  
273 the AR model, and replicated the positive sign of the instantaneous correlation between half-  
274 cycle amplitude and duration (Figure S2E; red bars;  $p=0.03$ , t-test). This further reinforces the  
275 notion that the observed correlations were not due to co-fluctuations on a slower time-scale.  
276 Again, similar results were obtained for full rather than half cycles (Figure S1C; red bars;  
277  $p=0.041$ , t-test).

278 Next, we investigated whether the correlation between half-cycle amplitudes and durations may  
279 have been influenced by small saccadic eye-movements that occur during fixation  
280 (microsaccades; MSs). These MSs can have a substantial impact on the amplitude and  
281 frequency of visually induced gamma oscillations (Bosman et al., 2009; Lowet et al., 2018;  
282 Lowet et al., 2016), which is also true in the datasets analyzed here (Figure 5A and 5B). It is  
283 possible for example that after a MS, both, half-cycle amplitude and duration, show a transient  
284 correlated change, which could result in either a positive or negative correlation between  
285 amplitude and duration. To address this, we performed correlation analyses after excluding data  
286 epochs between MSs and 250 ms thereafter. We performed the correlation analysis in the same  
287 way as for Figure 4AC, i.e. after regressing out longer-term trends in amplitudes and durations.  
288 Despite significant reductions in the amount of available data segments, we found that the  
289 resulting correlations between half-cycle amplitude and duration remained significantly positive  
290 in all examined datasets and in the average across datasets (Figure 5C; red bars;  $p=0.023$ , t-  
291 test, see S1D for analysis with full cycles; red bars;  $p=0.043$ , t-test). This indicates that the  
292 observed correlations between half-cycle amplitude and duration were not due to MS-related  
293 non-stationarities. Based on the analyses presented in Figures 4, 5, and S1, we conclude that  
294 half cycles with longer durations tend to have larger amplitudes.

295 The observed correlation was smaller than previously reported in rodent hippocampus (Atallah  
296 and Scanziani, 2009), but remained robust when accounting for extrinsic factors that may have  
297 obscured it. This correlation however does not necessarily imply a monotonic or linear  
298 relationship between half-cycle amplitudes and durations, as was reported by Atallah and  
299 Scanziani (2009). In order to examine this, we computed the average half-cycle amplitude for  
300 each possible half-cycle duration (Figure 6, blue curves; see Methods). We call this the cycle-  
301 based spectrum (CBS). For this and all following analyses, to minimize the aforementioned  
302 influence of slow stimulus-locked trends in gamma amplitude and frequency, we only used the  
303 final 250 ms of visual stimulation. To average CBSs across monkeys, we first converted half-  
304 cycle duration values to frequency values (in Hz). We then aligned the CBSs to the “gamma  
305 peak frequency” obtained from the conventional LFP power spectrum, i.e. the frequency at



306 which LFP gamma-band power reached a maximum. We did this separately for the gamma  
307 peak frequency obtained from the raw power spectrum (Figure 6A) or the power change  
308 spectrum (Figure 6B) to account for possible differences between them. We found that the  
309 average CBS had the shape of an inverted U-curve: half-cycle amplitude showed a non-  
310 monotonic relationship with frequency (i.e. inverse of duration); interestingly, amplitude was  
311 greatest at a frequency that was lower than the peak gamma frequency and showed a decline  
312 towards higher gamma frequencies.

313 We wondered how the shape of the CBS was related to the LFP power spectrum. We observed  
314 that the LFP power spectrum was approximately symmetric and showed a steep decrease in  
315 amplitude for frequencies below and above the peak gamma-frequency. Thus, the LFP power  
316 spectrum had a markedly different shape than the CBS. In other words, the CBS and the  
317 classical LFP power had a different dependence on frequency. This finding was surprising,  
318 considering that one would expect that the LFP power spectrum measures the average  
319 amplitude of oscillations at a given frequency. To understand this further, we considered that the  
320 LFP power spectrum should be determined by two main factors: (1) The average cycle  
321 amplitude as a function of a cycle's duration, and (2) how often different cycle durations, i.e. the  
322 corresponding frequencies, tended to occur (henceforth referred to as "rate of incidence").  
323 Because our analysis indicated that the shape of the LFP power spectrum is not well explained  
324 by the first factor, we expected that the rate of incidence of cycle-by-cycle durations better  
325 matches the shape of the LFP power spectrum. Indeed, we found that the rate of incidence of  
326 gamma-cycle frequencies showed a better match to the LFP power spectrum (Figure 6, red  
327 curves). Specifically, the most prevalent half-cycle frequency was found within one Hertz of the  
328 peak gamma frequency derived from either the raw LFP power spectrum or the power change  
329 spectrum. Thus, the LFP power spectrum was less informative about the amplitudes of the  
330 underlying half-cycles, and more informative about how often a given half-cycle duration tended  
331 to occur.

332 We wondered whether the observed dependency of amplitude on frequency was due to a  
333 ceiling effect, considering that in our analysis, we selected LFP segments (using the broad-band  
334 signal) in which gamma rhythms were relatively strong. This circumvented several  
335 methodological problems, as discussed above, but may have limited the generalizability of our  
336 findings. To address this issue, we re-analyzed the data after band-pass filtering the LFP in the  
337 gamma-frequency range (20-100 Hz). This modification in our approach substantially increased  
338 our sensitivity in detecting gamma episodes. The distributions of frequency and amplitude that  
339 we obtained after band-pass filtering were, nevertheless, highly similar to the ones calculated on  
340 the broad-band signal (Figures 6C and 6D). Thus, the specific distributions of frequency and  
341 amplitude shown in Figures 6A and 6B were likely not a consequence of a ceiling effect.

342 The analyses above were restricted to LFP signals, which mostly reflect the synaptic potentials  
343 in a population of neurons around the electrode. To gain deeper mechanistic insight, we next  
344 asked how duration and amplitude of LFP gamma cycles were related to neuronal spiking  
345 activity. The model of balanced excitation and inhibition, as it relates to the generation of

346 gamma oscillations, makes a specific prediction, namely that higher-amplitude gamma cycles  
347 are initiated by a stronger bout of excitatory spiking (Atallah and Scanziani, 2009). These bouts  
348 give rise to longer-lasting inhibition, resulting in longer gamma cycles. This, in turn, predicts the  
349 presence of a negative correlation between neuronal firing rates and LFP gamma frequency,  
350 which was reported for area CA3 of the rodent hippocampus (Atallah and Scanziani, 2009). In  
351 order to assess if this prediction holds for awake macaque V1, we analyzed multi-unit (MUA)  
352 activity along with LFPs recorded from area V1 in two macaques. Spiking activity was analyzed  
353 in conjunction with gamma oscillatory epochs, which were extracted from the LFP using the  
354 same general approach as described above (see Methods). For each MUA, we computed both  
355 the normalized spike count (number of spikes per cycle) (Figure 7A) and the firing rate (number  
356 of spikes per second) (Figure 7B) as a function of the cycle-by-cycle frequency, i.e. the inverse  
357 of cycle-by-cycle duration (see Methods). The normalized spike count was negatively correlated  
358 with the gamma-cycle frequency (Figure 7D, first pair of bars), which indicates that units fired  
359 more spikes in cycles with a longer duration. Note that spike count per cycle might be  
360 decreasing with frequency simply because higher frequencies entail shorter cycles. Indeed,  
361 when we corrected for this by dividing cycle-wise spike count by cycle length, and thereby  
362 calculating firing rate, we found it to correlate positively with frequency (Figure 7D, second pair  
363 of bars).

364 These analyses were performed on the MUA, which comprises the spiking activity of a variety of  
365 cell types. It is possible that our findings on the MUA reflected the activity of FS interneurons  
366 rather than excitatory neurons (Vinck et al., 2013a). To address this, we therefore sorted the  
367 MUA into single units. We classified these single units into broad and narrow-waveform units,  
368 which correspond to putative pyramidal cells and putative interneurons, respectively (Mitchell et  
369 al., 2007; Vinck et al., 2013a). We then repeated the previous analyses on these putative cell  
370 classes. We observed that both cell types exhibited a similar behavior to the MUA, i.e. their  
371 firing rates were positively correlated with frequency (Figure 7D, three rightmost pairs of bars).  
372 Thus, the relationship between unit firing and gamma cycle duration was opposite to the  
373 prediction by the abovementioned model of E-I balance: In awake macaque V1, neuronal firing  
374 rates were lower in longer gamma cycles.

375 We found that longer gamma cycles had higher amplitudes but were accompanied by lower  
376 firing rates. At first sight, this appears puzzling, considering that one would expect high-  
377 amplitude cycles to reflect high firing rates. One possible explanation is that unit activity was  
378 more synchronized during longer gamma cycles. To investigate this, we computed spike-LFP  
379 phase-locking for each MUA, separately for gamma cycles of different durations. Phase-locking  
380 was quantified by the pairwise phase consistency (PPC) (Vinck et al., 2010b), which removes  
381 potential biases due to spike count or spike rate. We found that spike-LFP phase-locking was  
382 negatively correlated with frequency (Figure 8C, Figure 8D third pair of bars). Thus, in macaque  
383 V1, longer gamma cycles exhibited neuronal spiking activity with lower firing rates, yet more  
384 precise phase locking.

385 If gamma cycles with longer duration were accompanied by higher phase-locking, this entails  
386 that firing rates showed a stronger modulation as a function of gamma phase. Thus, in longer  
387 gamma cycles, firing rates might have been overall lower, but showing a stronger transient  
388 peak. In fact, Atallah and Scanziani reported that in rodent CA3, long gamma cycles were  
389 accompanied by strong, transient activation peaks. To directly examine how firing rates  
390 depended on gamma phase, we divided each gamma cycle into eight non-overlapping phase  
391 bins. We then computed the mean MUA firing rates for these different phase bins, separately for  
392 gamma cycles of different durations. Comparing longer with shorter gamma cycles, we found  
393 that in longer gamma cycles, firing rates were particularly strongly decreased at the non-  
394 preferred gamma phase, but only weakly decreased at the preferred gamma-phase (Figure 8).  
395 Note that this amounts to a greater depth of firing-rate modulation for longer gamma cycles,  
396 which is consistent with the positive correlation between spike-LFP phase-locking and gamma  
397 cycle duration (Figures 7C and 7D). Thus, in longer gamma cycles, synchrony was overall  
398 enhanced, which was primarily accounted for by a decrease in firing at the non-preferred  
399 gamma phase, but not by an increase in firing at the preferred gamma-phase.

## 400 **DISCUSSION**

### 401 **Summary**

402 Gamma oscillations likely play a critical role in cortical communication. Key parameters of the  
403 gamma rhythm are its amplitude and its frequency. Amplitude and frequency of gamma  
404 oscillations fluctuate considerably over time, which may have important consequences for the  
405 way in which gamma subserves communication. It is unclear how spontaneous fluctuations in  
406 gamma amplitude and frequency are related to one another, and to the changes in firing activity  
407 in the local circuit. We addressed this question by recording local field potentials (LFPs) and  
408 spiking activity from primary visual cortex of awake macaques. We developed a method to  
409 detect the amplitude and duration of individual gamma cycles on broadband LFPs. We found  
410 that in macaque V1, across gamma cycles (or half cycles), there is a positive correlation  
411 between the cycles' amplitudes and durations. This is specific to amplitudes and durations taken  
412 from the same cycles (or half cycles), and it is strongly diminished or absent if amplitudes and  
413 durations are taken from neighboring cycles (or half cycles). This finding was not due to several  
414 factors that can influence both amplitude and frequency, like the time after stimulus onset or  
415 microsaccades.

416 We also found that the instantaneous amplitude and duration of individual gamma cycles have a  
417 complex relationship with the power spectrum: The distribution of durations of gamma cycles is  
418 aligned to the power spectral peak, whereas the distribution of amplitudes is skewed towards  
419 lower frequencies. This indicates that the power spectrum in the gamma range fails to  
420 accurately capture the distribution of amplitudes for a given gamma frequency, and, instead,  
421 better reflects the distribution of gamma-cycle durations.

422 Next, we examined how neuronal spiking varies as a function of gamma-cycle duration. We  
423 observed that the firing rates of single units and multi-unit activity (in spikes/s) are negatively

424 correlated with the duration of gamma cycles, whereas the strength of spike-LFP phase locking  
425 is positively correlated with gamma-cycle duration. Finally, we revealed that these patterns can  
426 be explained by the fact that the depth of firing rate modulation by gamma phase increases with  
427 gamma cycle duration.

428 In summary, these results show that, in macaque V1, shorter gamma cycles have lower  
429 amplitudes and synchrony yet higher firing rates, whereas longer gamma cycles have higher  
430 amplitudes and synchrony yet lower firing rates. This suggests that long gamma cycles are  
431 driven by a strong rhythmic inhibitory current that prolongs the cycle and leads to weaker overall  
432 firing.

### 433 **Comparison with previous work**

434 A previous study has addressed the correlation between instantaneous amplitude and  
435 frequency of gamma in the CA3 field of the rat hippocampus under several different conditions  
436 (awake freely moving, anesthetized, in vitro) (Atallah and Scanziani, 2009). This study reported  
437 a strong positive correlation between the amplitude of each gamma cycle and its duration. We  
438 show here that these positive correlations can arise spuriously due to the employed analytical  
439 approach, mostly through the detection of noisy fluctuations in the signal. Indeed, we find  
440 correlations similar to (Atallah and Scanziani, 2009) in signals where a strong gamma rhythm is  
441 absent, namely in the baseline period of our data and in synthetic  $1/f^n$  noise. This likely also  
442 applies to the correlation between gamma-cycle durations in the LFP and gamma-cycle  
443 amplitudes in intracellular IPSC measurements (Figure 5F of (Atallah and Scanziani, 2009)),  
444 because LFP and IPSC from neighboring sites are highly correlated (Haider et al., 2016). In  
445 general, the detection of instantaneous amplitude and frequency is difficult, because of the  
446 presence of non-stationarities in the analyzed signal, and filter-generated smearing between  
447 adjacent data points in the time domain. For this reason, we implemented an algorithm for the  
448 detection of gamma-oscillatory epochs, i.e. periods in the LFP which are dominated by gamma  
449 oscillations. The correlations calculated for these periods remained positive, but were weaker  
450 compared to (Atallah and Scanziani, 2009). This difference in magnitude between our findings  
451 and (Atallah and Scanziani, 2009) is due to a variety of factors. A major factor is that, in our  
452 data, gamma cycle amplitude and duration do not co-vary monotonically, but rather exhibit an  
453 inverted U-curve relationship (Figure 6).

454 Another major difference between our results and (Atallah and Scanziani, 2009) is in the  
455 instantaneous relationship of firing rates with gamma cycle amplitude and duration. In (Atallah  
456 and Scanziani, 2009), multi-unit activity (MUA) in rodent CA3 was shown to be concentrated in  
457 the descending phase of the gamma-filtered LFP and to decrease as a function of the duration  
458 of the gamma cycle. By contrast, we found in awake macaque V1 that spiking activity is  
459 negatively correlated with gamma cycle duration. We observed the same pattern when we  
460 sorted the MUA into putative pyramidal cells and putative interneurons. By contrast, gamma-  
461 cycle duration was positively correlated with the strength of MUA-LFP phase locking: longer  
462 gamma cycles contained spikes that were more strongly phase locked. A plausible  
463 interpretation of these results is that, in macaque V1, longer gamma cycles involve the relatively

464 synchronous recruitment of excitatory cells and, consequently, the relatively synchronous  
465 engagement of inhibitory interneurons, leading to the relative increase of the amplitude of  
466 gamma. On the other hand, during shorter gamma cycles, excitatory cells fire more often but  
467 also more asynchronously. This is likely accompanied by the more frequent but also more  
468 asynchronous firing of inhibitory cells. As a consequence, the network excitation and inhibition  
469 cancel each other out, resulting in the relative decrease of the amplitude of gamma oscillations.  
470 This conclusion is, indeed, supported by our finding that the modulation depth of MUA during  
471 the gamma cycle increases with the duration of the latter.

## 472 **Mechanisms and consequences**

473 Cortical gamma oscillations *in vivo* are thought to be typically generated by a PING mechanism,  
474 which entails an E-I balance (Börger and Kopell, 2003; Csicsvari et al., 2003; Hasenstaub et  
475 al., 2005; Salkoff et al., 2015; Tiesinga et al., 2001; Vinck et al., 2013a; Vinck et al., 2013b). The  
476 correlation between gamma-cycle amplitude and duration requires variability in those two  
477 parameters, and this variability could originate in the excitatory or the inhibitory component, or  
478 both. Atallah and Scanziani suggest that variability stems primarily from the excitatory  
479 component: Stronger bouts of excitation lead to stronger bouts of inhibition, which in turn lead to  
480 longer network silencing and thus longer gamma-cycle duration. The predictions of this model  
481 are consistent with the reported experimental results of Atallah and Scanziani in the  
482 hippocampal system. In our analysis of awake macaque V1 gamma, the predictions hold  
483 partially: We do find longer gamma cycles to be of higher amplitude; however, we also find them  
484 to show lower firing rates. In the visual system, the excitatory component can actually be  
485 manipulated experimentally, by changing the contrast of the visual stimulus. When contrast is  
486 increased, and thereby excitatory drive is enhanced, this leads (for most contrast values) to  
487 gamma of higher amplitude, yet also of higher frequency (Henrie and Shapley, 2005; Jia et al.,  
488 2013b; Ray and Maunsell, 2010; Roberts et al., 2013). These considerations suggest that the  
489 general PING mechanism of gamma generation is likely implemented in hippocampus and  
490 visual cortex in quite distinct circuit architectures, with important consequences for the relative  
491 roles of excitation versus inhibition. Specifically, in visual cortex, gamma is very strongly  
492 influenced by contextual mechanisms, which involve the synchronization among distributed  
493 columns and which are most likely exerted through inhibition (Vinck and Bosman, 2016). For  
494 example, large gratings or large uniform color surfaces lead to strong enhancement of gamma  
495 and strong inhibition of firing rates (Gieselmann and Thiele, 2008; Jia et al., 2013b; Peter et al.,  
496 2019). Thus, the dominant driver of the observed correlation in visual cortex might be the  
497 variability in the inhibitory component: Stronger bouts of inhibition lead to gamma cycles of  
498 larger amplitude and longer duration, and also to lower firing rates with stronger gamma-phase  
499 locking of the spikes. Each of these predictions is consistent with our results.

500 Note that the LFP primarily reflects postsynaptic currents in the dendrites of pyramidal neurons.  
501 These dendrites have biophysical properties that lead to a low-pass filtering of the postsynaptic  
502 currents (Branco and Häusser, 2011). This low-pass filtering likely interacts with the resonant  
503 (essentially band-pass) properties of the PING circuits. External drive to the PING circuit



504 generates gamma, and the low-pass characteristic of the involved pyramidal cells attenuates  
505 the amplitudes of faster gamma cycles. This might contribute to our observation that the  
506 amplitudes of relatively long gamma cycles are relatively large.

507 We found systematic relationships between the instantaneous gamma-cycle duration on the one  
508 hand, and instantaneous amplitude and spiking activity on the other hand. These relationships  
509 could have important consequences for the generation of long-range gamma-synchronization.  
510 Granger-causality analyses suggest that a gamma rhythm in primary visual cortex can entrain  
511 gamma in higher visual areas (Bastos et al., 2015; Bosman et al., 2012; Roberts et al., 2013).  
512 Furthermore, fluctuations in gamma frequency, either due to varying contrast or occurring  
513 spontaneously, are matched between V1 and V2 (Roberts et al., 2013). Strong, synchronous  
514 bouts of excitation in a lower area (e.g. V1) could induce a long gamma cycle both in the lower  
515 and in the higher area, due to strong, subsequent inhibition that is triggered in both areas. This  
516 could facilitate the emergence of gamma-coherence between the lower and higher visual area.

517 In natural vision, it is common that different stimuli activate multiple groups of neurons in  
518 primary visual cortex that compete for impact onto higher visual areas. Attention biases this  
519 competition such that the higher area is selectively receptive to the inputs of one of these  
520 neuronal groups (attentional target), and ignores the inputs of the other populations (distractors)  
521 (Bosman et al., 2012; Desimone and Duncan, 1995; Fries, 2015; Grothe et al., 2012; Reynolds  
522 et al., 1999). There is evidence that selective communication between areas is mediated by  
523 selective gamma synchronization (Bosman et al., 2012; Fries, 2015; Gregoriou et al., 2009;  
524 Grothe et al., 2012). When multiple input populations converge onto a single post-synaptic  
525 target, selective gamma synchronization can lead to selective information transmission (Akam  
526 and Kullmann, 2012; Börgers et al., 2008). The extent to which information can be selectively  
527 transmitted is affected by whether the competing gamma rhythms have different gamma  
528 phases, different gamma-peak frequencies, or show fluctuations in their gamma-peak frequency  
529 (Akam and Kullmann, 2012; Börgers et al., 2008; Lowet et al., 2017). Yet, the consequences of  
530 specific relationships between gamma frequency and gamma amplitude or local spike  
531 synchrony for inter-areal transmission remain to be explored. Our respective results may  
532 therefore have important consequences for the mechanisms underlying selective inter-areal  
533 gamma-synchronization, and should be implemented in future computational models.

## 534 **ACKNOWLEDGEMENTS**

535 We thank Michael Schmid and Richard Saunders for planning and performing surgical implants,  
536 and Thomas Stieglitz and Eva-Maria Fiedler for producing the polyimide-based ECoG arrays.  
537 PF acknowledges grant support by DFG (SPP 1665 FR2557/1-1, FOR 1847 FR2557/2-1,  
538 FR2557/5-1-CORNET, FR2557/6-1-NeuroTMR), EU (HEALTH-F2-2008-200728-BrainSynch,  
539 FP7-604102-HBP, FP7-600730-Magnetorodes), a European Young Investigator Award, NIH  
540 (1U54MH091657-WU-Minn-Consortium-HCP), and LOEWE (NeFF). MLS acknowledges grant  
541 support by HFSP (HFSP fellowship LT000904/2011-L).

542 **AUTHOR CONTRIBUTIONS**

543 Conceptualization, G.S., M.V., and P.F.; Methodology, G.S., M.V., and P.F.; Software, G.S.,  
544 J.R.D., and M.V.; Formal Analysis, G.S., J.R.D., I.O., M.V., and P.F.; Investigation, G.S., J.R.D.,  
545 M.L.S., C.A.B., B.L., A.P., J.K.-L., R.R., S.N., W.S., and P.F.; Writing – Original Draft, G.S.,  
546 M.V., and P.F.; Writing – Review & Editing, all authors; Supervision, M.V. and P.F.; Funding  
547 Acquisition, W.S., M.V., and P.F..

548 **COMPETING FINANCIAL INTERESTS**

549 The authors declare no competing financial interests.

550 **STAR ★ METHODS**

551 **KEY RESOURCES TABLE**

| REAGENT or RESOURCE                                                        | SOURCE                                     | IDENTIFIER                                                                                                                                                                                                                                        |
|----------------------------------------------------------------------------|--------------------------------------------|---------------------------------------------------------------------------------------------------------------------------------------------------------------------------------------------------------------------------------------------------|
| Experimental Models: Organisms/Strains                                     |                                            |                                                                                                                                                                                                                                                   |
| Macaque monkeys                                                            | German Primate Center                      | N/A                                                                                                                                                                                                                                               |
| Software and Algorithms                                                    |                                            |                                                                                                                                                                                                                                                   |
| Stimulus control:<br>NIMH CORTEX software<br>ARCADE<br>Custom LabView code | NIMH<br>N/A<br>National Instruments        | <a href="https://dally.nimh.nih.gov/index.html">dally.nimh.nih.gov/index.html</a><br><a href="https://gitlab.com/esi-neuroscience/arcade">https://gitlab.com/esi-neuroscience/arcade</a><br><a href="https://www.ni.com/">https://www.ni.com/</a> |
| MATLAB 2016b                                                               | MathWorks Inc.                             | <a href="http://www.mathworks.com">www.mathworks.com</a>                                                                                                                                                                                          |
| FieldTrip Toolbox                                                          | (Oostenveld et al., 2011)                  | <a href="http://www.fieldtriptoolbox.org">www.fieldtriptoolbox.org</a>                                                                                                                                                                            |
| Other                                                                      |                                            |                                                                                                                                                                                                                                                   |
| ECoG Grid                                                                  | (Rubehn et al., 2009)                      | N/A                                                                                                                                                                                                                                               |
| CerePort ("Utah") array                                                    | Blackrock Microsystems                     | <a href="https://www.blackrockmicro.com">https://www.blackrockmicro.com</a>                                                                                                                                                                       |
| SC32-1 array                                                               | Gray Matter Research                       | <a href="https://www.graymatter-research.com/">https://www.graymatter-research.com/</a>                                                                                                                                                           |
| Hydraulic Microdrives                                                      | Narishige Scientific Instrument Laboratory | <a href="https://www.narishige.co.jp/english/">https://www.narishige.co.jp/english/</a>                                                                                                                                                           |
| PZ2 pre-amplifier                                                          | Tucker Davis Technologies                  | <a href="https://www.tdt.com/">https://www.tdt.com/</a>                                                                                                                                                                                           |
| RZ2 amplifier                                                              | Tucker Davis Technologies                  | <a href="https://www.tdt.com/">https://www.tdt.com/</a>                                                                                                                                                                                           |
| RS4 data streamer                                                          | Tucker Davis Technologies                  | <a href="https://www.tdt.com/">https://www.tdt.com/</a>                                                                                                                                                                                           |
| Digital Lynx system                                                        | Neuralynx                                  | <a href="http://www.neuralynx.com">www.neuralynx.com</a>                                                                                                                                                                                          |
| Plexon pre-amplifier                                                       | Plexon                                     | <a href="http://www.plexon.com">www.plexon.com</a>                                                                                                                                                                                                |
| Headstage amplifier                                                        | Plexon                                     | <a href="http://www.plexon.com">www.plexon.com</a>                                                                                                                                                                                                |
| E-series acquisition board                                                 | National Instruments                       | <a href="https://www.ni.com/">https://www.ni.com/</a>                                                                                                                                                                                             |
| Eyelink 1000                                                               | SR Research Ltd.                           | <a href="https://www.sr-research.com/">https://www.sr-research.com/</a>                                                                                                                                                                           |
| Scleral search coil                                                        | Crist Instruments                          | <a href="http://www.cristinstrument.com/">http://www.cristinstrument.com/</a>                                                                                                                                                                     |
| ET-49B system                                                              | Thomas Recording                           | <a href="http://www.thomasrecording.com">www.thomasrecording.com</a>                                                                                                                                                                              |

552 **CONTACT FOR REAGENT AND RESOURCE SHARING**

553 Further information and requests for resources should be directed to and will be fulfilled by the  
554 Lead Contact, Pascal Fries ([pascal.fries@esi-frankfurt.de](mailto:pascal.fries@esi-frankfurt.de)).

555 **EXPERIMENTAL MODEL AND SUBJECT DETAILS**

556 We analyzed data from a total of 6 adult macaque monkeys (*macaca mulatta*), referred to as  
557 monkey H, I, J, L, P and T. Monkeys I and L are/were female, the others male. The experiments  
558 were approved by the responsible regional or local authority, which was the  
559 Regierungspräsidium Darmstadt, Germany, for monkeys H, I, J, L and T, and the ethics  
560 committee of the Radboud University, Nijmegen, Netherlands, for monkey P. Parts of the data  
561 have been used in other publications (Lima et al., 2010; Onorato et al., 2019; Vinck et al.,  
562 2010a; Womelsdorf et al., 2012).

## 563 **METHOD DETAILS:**

### 564 **Recordings**

565 We used different recording procedures and stimulus paradigms for the different monkeys, and  
566 will describe these separately for the different monkeys.

### 567 **Task**

568 All monkeys performed a passive fixation task. The specific details of the task performed by  
569 monkeys I and P were as follows: Monkeys initiated a trial by depressing a lever (monkey I) or  
570 touching a bar (monkey P), which triggered the appearance of a fixation point, and then brought  
571 their gaze into a fixation window around the fixation point. Monkeys were required to fixate on  
572 the fixation point, which was centered on a gray background, after which a stimulus was  
573 presented. If they kept their gaze within the fixation window as long as the stimulus was  
574 presented, they were given a juice reward after the release of the lever/bar following stimulus  
575 offset. Monkeys H, J, L and T performed a similar task, with the initiation/termination of the trial  
576 being solely dependent on the acquisition/release of fixation (i.e. not dependent on pressing a  
577 lever or touching a bar). Further details of this version of the task are described in (Peter et al.,  
578 2019) for monkey H, and in (Lima et al., 2010) for monkeys J and L. For all monkeys, fixation  
579 windows ranged between 0.5 and 1.2 degrees radius.

### 580 **Recordings (electrodes, reference)**

581 For monkey H, recordings were done with CerePort ("Utah") arrays (64 micro-electrodes; inter-  
582 electrode distance 400  $\mu\text{m}$ , tip radius 3-5  $\mu\text{m}$ , impedances 70-800 k $\Omega$ , half of them with a length  
583 of 1 mm and half with a length of 0.6 mm, Blackrock Microsystems). A reference wire was  
584 inserted under the dura toward parietal cortex. Further details are reported in (Peter et al.,  
585 2019). For monkey I, a semi-chronic microelectrode array micro-drive was implanted over area  
586 V1 of the left hemisphere (SC32-1 drive from Gray Matter Research; 32 independently movable  
587 glass insulated tungsten electrodes with an impedance range of 0.5-2 M $\Omega$  and an inter-  
588 electrode distance of 1.5 mm, electrodes from Alpha Omega). We used the micro-drive  
589 chamber as the recording reference. For monkeys J and L, recordings were performed with 2 to  
590 10 microelectrodes, made of quartz-insulated, tungsten-platinum material (diameter: 80  $\mu\text{m}$ ;  
591 impedances between 0.3 and 1M $\Omega$ ; wire from Thomas Recording). These were inserted  
592 independently into the cortex via transdural guide tubes (diameter: 300 $\mu\text{m}$ ; Ehrhardt Söhne),  
593 which were assembled in a customized recording device (designed by S.N.). This device  
594 consisted of 5 precision hydraulic micro-drives mounted on an X-Y stage (MO-95, Narishige  
595 Scientific Instrument Laboratory, Japan), which was secured on the recording chamber by  
596 means of a screw mount adapter. Inter-electrode distance ranged between 1 and 3 mm. We  
597 used the micro-drive chamber as the recording reference. Further details are reported in (Lima  
598 et al., 2010). For monkey P, we recorded neuronal activity with a micro-machined 252-channel  
599 electrocorticogram (ECoG) electrode array implanted subdurally on the left hemisphere  
600 (Bosman et al., 2012; Lewis et al., 2016; Rubehn et al., 2009). We used a silver ball implanted  
601 over occipital cortex of the right hemisphere as the recording reference. For monkey T, we

602 recorded neuronal activity with a micro-machined 252-channel ECoG electrode array implanted  
603 subdurally over areas V1 and V4 of the left hemisphere (252 electrodes; inter-electrode distance  
604 1400  $\mu\text{m}$ ; electrode diameter 400  $\mu\text{m}$ , IMTEK & BCF, University of Freiburg) (Rubehn et al.,  
605 2009). We used an electrode adjacent to the lunate sulcus as a recording reference for the  
606 section of the array covering area V1.

### 607 **Recordings (acquisition, filtering)**

608 For monkeys H, I and T, we acquired data with Tucker Davis Technologies (TDT) systems. Data  
609 were filtered between 0.35 and 7500 Hz (3 dB filter cutoffs) and digitized at 24,414.0625 Hz  
610 (TDT PZ2 preamplifier). For monkeys J and L, we obtained spiking activity and the LFP by  
611 amplifying 1000 times and band-pass filtering (0.7-6.0 kHz for MUA; 0.7-170 Hz for LFP) with a  
612 customized 32-channel Plexon pre-amplifier connected to an HST16o25 headstage (Plexon  
613 Inc., USA). Additional 103-fold signal amplification was performed by onboard amplifiers (E-  
614 series acquisition boards, National Instruments, USA). For monkey P, we acquired data with a  
615 Neuralynx system. Data were amplified 20 times, high-pass filtered at 0.159 Hz, low-pass  
616 filtered at 8 kHz, and digitized at 32 kHz by a Neuralynx Digital Lynx system.

### 617 **Receptive field mapping/Eccentricities**

618 Receptive fields (RFs) were mapped with either bar stimuli ((Lima et al., 2010; Peter et al.,  
619 2019); monkeys H, I, J, L), patches of moving gratings ((Bosman et al., 2012); monkey P) or  
620 red dots (monkey T). The signal used for RF mapping was multi-unit activity (MUA) for  
621 monkeys H, I, J, L, and the LFP gamma power for monkeys P and T. For monkeys J and L, we  
622 recorded neuronal activity from the opercular region of area V1, leading to RF-center  
623 eccentricities of 2-3 deg, and occasionally from the superior bank of the calcarine sulcus,  
624 leading to RF-center eccentricities of 10-13 deg. For monkey H, RF-center eccentricities ranged  
625 between 5.2 and 7.1 deg (median RF-center eccentricity 6.2 deg). For monkey I, RF-center  
626 eccentricities ranged between 2.6 and 6.7 deg (median RF-center eccentricity 4.5 deg). For  
627 monkey P, RF-center eccentricities ranged between 3 and 5.7 deg (median RF-center  
628 eccentricity 4.6 deg). For monkey T, RF-center eccentricities ranged between 3.1 and 7.1 deg  
629 (median RF-center eccentricity 3.8 deg).

### 630 **Eye position monitoring**

631 For monkeys H, I and T, eye movements and pupil size were recorded at 1000 Hz using an  
632 Eyelink 1000 system (SR Research Ltd.) with infrared illumination. For monkeys J and L, we  
633 monitored the eye position with a scleral search coil system (DNI, Crist Instruments, USA;  
634 sampling rate of 500 Hz). For monkey P we monitored eye position with an infrared camera  
635 system (Thomas Recording ET-49B system) at a sampling rate of 230 Hz. We used a  
636 standardized fixation task in order to calibrate eye signals before each recording session.

### 637 **Behavioral control and stimulus presentation**

638 Stimulus presentation and behavioral control was implemented as follows: The software toolbox  
639 ARCADE ((Dowdall et al., 2018) <https://gitlab.com/esi-neuroscience/arcade>) was used for



640 monkeys H, I and T; Custom LabVIEW code (Lab-VIEW, National Instruments, USA) was used  
641 for monkeys J and L; The software toolbox CORTEX ([dally.nimh.nih.gov/index.html](http://dally.nimh.nih.gov/index.html)) was used  
642 for monkey P.

643 Monkeys H and I were presented with full-screen uniform color surfaces. Surface color varied  
644 across trials according to a pseudo-random sequence. For our analyses, we used the hue that  
645 elicited the strongest gamma oscillations (monkey H RGB: 149 99 0; monkey I RGB: 255 0 0).  
646 In a separate session, monkey I was also repeatedly presented with a full-screen drifting  
647 square-wave red-and-green grating of a fixed initial phase and drift-direction (RGB for red 255 0  
648 0 and green 0 255 0; spatial frequency: 1.5 cycles/degree; temporal frequency 2 Hz). Monkeys  
649 J and L were presented with large drifting square-wave black-and-white gratings (spatial  
650 frequencies: 1.25-2 cycles/degree; temporal frequencies: 1.4-2Hz) and plaid stimuli. Only the  
651 gratings were used for our analyses. The gratings had a diameter of 8 degrees of visual angle  
652 and were positioned at the average of the RF centers of the recorded MUA. In each trial, the  
653 direction of the grating drift was randomly chosen from 16 directions (in steps of 22.5 degrees).  
654 Monkey P was repeatedly presented with a full-screen drifting square-wave black-and-white  
655 grating of a fixed initial phase and drift-direction (spatial frequency: ~1 cycle/degree; temporal  
656 frequency ~1Hz). Monkey T was presented with full-screen uniform color surfaces, with the  
657 color changing across trials according to a pseudo-random sequence. For our analyses, we  
658 used two hues that elicited the strongest gamma oscillations (RGB: 255 0 0 and 0 0 255). In  
659 separate sessions, monkey T was also presented with full-screen drifting square-wave colored  
660 gratings of pseudo-random initial phases and drift-directions. For our analyses, we used the  
661 gratings that elicited the strongest gamma oscillations (red-green RGB: 255 0 0 and 0 255 0 and  
662 blue-yellow RGB: 0 0 255 and 255 255 0; spatial frequency: 1.5 cycles/degree; temporal  
663 frequency 2 Hz). For monkeys H, I and T, stimuli were presented on 120 Hz LCD monitors  
664 (Wang and Nikolić, 2011), without gamma correction. For monkeys J, L and P, stimuli were  
665 presented on CRT monitors (100-120 Hz), after gamma correction.

## 666 **Data analysis**

667 All analyses were done in MATLAB (The MathWorks) using custom scripts and the FieldTrip  
668 toolbox ([www.fieldtriptoolbox.org](http://www.fieldtriptoolbox.org) (Oostenveld et al., 2011)). The analyses were done only on  
669 correct trials. In monkeys P and T, we selected the 25% electrodes/sites over area V1 with the  
670 strongest visually induced gamma band activity, because the grids covered a relatively large  
671 region of retinotopic space and contained electrodes that were poorly driven by the visual  
672 stimulus. In monkeys H, I, J and L, we analyzed all visually driven electrodes. In all monkeys  
673 except for monkey T, we analyzed LFP signals that were recorded relative to the common  
674 reference signal (described above). For monkey T, we calculated local bipolar derivatives  
675 between LFPs from immediately neighboring electrodes. i.e., differences (sample-by-sample in  
676 the time domain), similar to previous studies (Bastos et al., 2015; Bosman et al., 2012). This  
677 was done because the global references in monkey T were positioned over V1 and V4 in the  
678 same hemisphere.

## 679 **Preprocessing**

680 For monkeys H, I and T, LFPs were obtained from the broadband signal after low-pass filtering  
681 (sixth order Butterworth filter with a corner frequency of 500 Hz), high-pass filtering (third order  
682 Butterworth filter with a corner frequency of 2 Hz for monkey T and 4 Hz for monkeys H and I)  
683 and down-sampling to 2034.51 Hz. For monkeys J and L, LFPs were filtered between 0.7-  
684 170Hz (hardware-filter, described above) and down-sampled to 1 kHz. For monkey P, we  
685 obtained LFP signals by low-pass filtering at 200 Hz and down-sampling to 1 kHz. In addition,  
686 for monkey P, we removed powerline artifacts at 50 Hz and its harmonics with a digital notch  
687 filter.

## 688 **Segmenting Data into Epochs, and Calculation of Power and TFR**

689 To estimate the LFP power spectra in the stimulus and baseline periods (Figures 1B, 1C, 1G  
690 and 1H, Figure 6, Figures 7A-7C), we used the following procedure: Power spectra were  
691 estimated separately for the pre-stimulus period and the stimulation period. The pre-stimulus  
692 period was the time between fixation onset and stimulus onset. During the pre-stimulus period,  
693 monkeys fixated on a central dot on a gray screen, and there was no other stimulus presented.  
694 For monkeys H, I, P and T, the pre-stimulus and stimulation periods were of variable length  
695 across trials. We kept data corresponding to the pre-stimulus and stimulation period with the  
696 minimum length (monkey H: baseline 0.3s / stimulation 1.5s; monkey I: baseline 0.5s /  
697 stimulation 2s; monkey P: baseline 0.3s / stimulation 2.3s; monkey T: baseline 1.1s / stimulation  
698 with full-screen gratings 2.8s / stimulation with full-screen uniform color surfaces 3.2s). For  
699 monkeys J and L, the pre-stimulus and grating-stimulation periods had a stable duration across  
700 trials within a session but their duration varied between sessions. All of the available pre-  
701 stimulus and grating data were analyzed for those monkeys (baseline 0.8-1s / stimulation 2-  
702 2.4s). The power spectral analysis was based on epochs of fixed lengths. Therefore, the  
703 described task periods were cut into non-overlapping epochs. We aimed at excluding data soon  
704 after stimulus onset (“event”) to minimize the influence of the stimulus-onset related event-  
705 related potential on our analyses. Therefore, periods were cut into non-overlapping epochs,  
706 starting from the end of the period and stopping before an epoch would have included data  
707 approximately 0.5 s after those events. For Figures 1B, 1C, 1G and 1H, the estimation of power  
708 spectra was based on epochs of 0.5 s length; for Figures 6 and S2B, power spectra were based  
709 on epochs of 0.25 s. Data epochs were Hann tapered, to achieve a fundamental spectral  
710 resolution (Rayleigh frequency) of 2 Hz (4 Hz for figures 6 and S2B), and then Fourier  
711 transformed. For the time-frequency analysis of power, we used window lengths of  $\pm 2.5$  cycles  
712 per frequency which were slid over the available data in steps of 1 ms. Power during the  
713 stimulation period was normalized to the pre-stimulus baseline period, separately for each  
714 channel, in the following manner: Power per frequency and per trial was calculated as described  
715 above. Power calculated for the pre-stimulus baseline period was then averaged across trials.  
716 Finally, trial-wise normalized power was calculated for the stimulation period by subtracting the  
717 average pre-stimulus spectrum and then dividing by it.

## 718 **Spike sorting**

719 Single units were isolated through semi-automated spike sorting (Onorato et al., 2019). First, we  
720 performed semi-automatic clustering with the KlustaKwik 3.0 software. The energy of the spike  
721 waveform and the energy of its first derivative were used as features in this procedure. A  
722 candidate single unit was accepted if the corresponding cluster was clearly separable from the  
723 noise clusters, and if the inter-spike-interval distribution had a clear refractory-period. This was  
724 done manually with the M-Clust software. In addition, we used the isolation distance (ID;  
725 (Schmitzer-Torbert et al., 2005)) as a measure of cluster separation. The ID of a candidate  
726 single unit had to exceed 20 in order for it to be included in our analyses. The median ID was  
727 25.05. This procedure led to the isolation of 100 single units. For each isolated single unit, we  
728 computed the peak-to-trough duration of the average AP waveform. Single units with long  
729 (>0.235ms) and short (<0.235ms) peak-to-trough durations were named “broad-waveform”  
730 (BW) and “narrow-waveform” (NW) neurons, respectively. Broad-waveform neurons  
731 corresponded to 29% of the single unit population.

## 732 **Initial estimation of gamma-cycle amplitude and duration (cf. Atallah & Scanziani)**

733 For our initial analyses of individual gamma cycles, we implemented the algorithm as described  
734 by Atallah and Scanziani (2009) for data from awake freely-moving rats. In short, we first low-  
735 pass filtered the LFP by using a 40 ms moving average filter and then subtracted this filtered  
736 signal from the original time series (Experimental Procedures and Supplemental Experimental  
737 Procedures of Atallah and Scanziani, and their personal communication with us), which  
738 effectively corresponds to a high-pass filter with a corner frequency at approximately 20 Hz. The  
739 resulting signal was further band-pass filtered in the range of 5-100 Hz with a 3<sup>rd</sup> order, two-way  
740 Butterworth filter. Gamma-cycle peaks and troughs were then defined as local maxima and  
741 minima, respectively. Furthermore, gamma-cycle amplitudes were defined as the difference  
742 between the voltage of a given peak and its subsequent trough. Similarly, gamma-cycle  
743 durations were defined as the interval between a given peak and its subsequent peak. This  
744 analysis was done in segments of the filtered signal which displayed high power in the individual  
745 gamma frequency range of each dataset (peak gamma frequency $\pm$ 20 Hz). These segments  
746 were extracted in the following way: A time-power representation of each trial was calculated  
747 with 5 discrete prolate slespian sequences and windows of 100 ms which were slid over the  
748 available data in steps of 25 ms. Gamma episodes were defined as segments of the resulting  
749 time-series which lasted for more than 100 ms and had power that exceeded a threshold. This  
750 threshold was calculated separately for each trial as the difference between the mean of the  
751 time-power representation and its standard deviation.

## 752 **Generation of colored noise**

753 In Figure 2G, we analyzed the correlations obtained with the Atallah-Scanziani method for  
754 colored noise. We generated noise with power spectra following a  $1/f^n$  function, where  $f$  denotes  
755 frequency and  $n$  assumes 11 equally spaced values between, and including, 0 (corresponding  
756 to white noise) and 2 (corresponding to Brownian noise). This was done in the following  
757 manner: (i) 1000 white noise traces containing  $10^6$  samples were generated for each  $n$ . (ii) Each

758 trace was Fourier transformed. (iii) The complex coefficients of the positive frequencies in the  
759 resulting spectra were multiplied by the  $1/f^n$  function. (iv) A synthetic spectrum was constructed  
760 by concatenating the above complex coefficients with the conjugate of their flipped version. (v)  
761 The resulting spectrum was inverse Fourier transformed to obtain time series.

## 762 **Improved estimation of gamma-cycle amplitude and duration**

763 We developed an improved method to extract gamma-cycle amplitude and frequency from the  
764 LFP signals as follows:

765 1. We computed the Hilbert-transform of the broadband LFP signal to obtain the analytic signal  
766 and derive the time-resolved phase from it. We used the broadband signal, because band-pass  
767 filtering creates dependencies between voltage values across time points, and can transform  
768 transient, non-oscillatory deflections into rhythmic events.

769 2. We detected gamma cycles as follows: First, we detected all the zero-crossings of the phase.  
770 Such phase zero crossings occur in the neighborhood of peaks and troughs in the original LFP  
771 signal. For each k-th zero-crossing, we examined whether the angular velocity of the phase was  
772 positive for all time points between the k - 1-th to the k + 1-th zero-crossing (similar to (Muller et  
773 al., 2014)). If this was not the case, then there was a negative “phase-slip” in which the  
774 instantaneous frequency became negative, and the respective zero crossing plus/minus two  
775 neighboring zero crossings were discarded. Negative instantaneous frequencies make the  
776 interpretation of the instantaneous frequency and amplitude ambiguous, and are typically  
777 accompanied by small peaks/troughs in the LFP signal. This violates our model of the gamma  
778 oscillation as a signal with a positive frequency which fluctuates over time,  $y(t) = A(t) * \cos$   
779  $(\omega(t)*t + \varphi)$ , where  $A(t)$  and  $\omega(t)$  are the instantaneous amplitude and frequency fluctuating  
780 over time.

781 If there was no negative phase-slip, then we identified gamma peaks by first detecting negative-  
782 to-positive zero crossings in the phase of the analytic signal. For each of these crossings, we  
783 then identified the nearest local maximum in the LFP signal (Figure 3D). Likewise, gamma  
784 troughs were identified by detecting positive-to-negative zero crossings and identifying nearby  
785 local minima. Using the detected gamma peaks and troughs, we then determined the gamma-  
786 cycle amplitude and duration. To obtain estimates of gamma-cycle amplitude and duration with  
787 the maximum attainable temporal resolution, we divided each gamma cycle into “half-cycles”:  
788 The first half-cycle comprised the data segment from the trough to the peak, and the second  
789 half-cycle from the peak to the trough. For each half-cycle, amplitude was defined as the  
790 difference between the respective peak and trough, and duration was defined as the  
791 corresponding time interval. For each detected half-cycle, we thus obtained an amplitude and  
792 duration value. For comparison, we also determined amplitude and duration for full gamma  
793 cycles. A gamma cycle comprised the data from one peak to the next peak. Amplitude was  
794 defined as the voltage difference between the first peak and the trough. Duration was defined at  
795 the time between the two peaks.

796 Note that for the analysis of the relationship between individual gamma cycles and spiking  
797 activity, we used a band-pass filter (3<sup>rd</sup> order, two-pass Butterworth, with a pass-band of 40-90  
798 Hz for monkey J and 25-55 Hz for monkey L). In this case, we used an additional criterion to  
799 reject epochs of spurious oscillatory activity (Onorato et al., 2019): We ran the same cycle-  
800 selection procedure on the pre-stimulus period, in which narrow-band gamma-band oscillations  
801 are virtually absent. For the pre-stimulus period, we obtained the mean  $\mu_{pre}$  and standard  
802 deviation  $\sigma_{pre}$  of the distribution of amplitudes. These amplitudes were measured as the peak-to-  
803 trough distance of the gamma cycle. A cycle in the stimulus period with amplitude  $A$  was only  
804 selected if  $(A - \mu_{pre})/\sigma_{pre} > 1:63$  (which is equivalent to a one-sided T-test at  $P < 0.05$ ). We  
805 filtered the LFP with the purpose of increasing the number of selected gamma epochs,  
806 considering that the analysis of unit firing rates and spike-field phase-locking demands a  
807 relatively large amount of data. Note that we have shown in Figure 7 that the distributions of  
808 amplitude and frequency after band-pass filtering are comparable to the distributions obtained  
809 without band-pass filtering. In addition, the potential issues related to filtering only apply to the  
810 calculation of correlations of amplitude and duration and not to the calculation of the correlation  
811 of spiking strength and gamma frequency. This is due to the fact that filtering may generate  
812 artificial correlations between the amplitudes and durations of deflections of the same time  
813 series (explained further in the results section). The filter used on the LFP is not used on the  
814 spiking activity. Thus, artificial correlations between spiking and cycle-by-cycle frequency are  
815 not likely.

816 Amplitude and frequency values were extracted from selected gamma epochs of a duration of at  
817 least 2 full cycles.

### 818 **Computation of time-resolved correlations between amplitude and frequency**

819 In the case of our V1 recordings, we observed that gamma amplitude and cycle duration  
820 progressively increased over time after the onset of a drifting grating stimulus. (Figures 1C-1D).  
821 By contrast, after the onset of a uniform color surface, gamma amplitude and duration  
822 progressively decreased and increased over time, respectively (Figures 1G-1H). These changes  
823 with time after stimulus onset could contribute to the correlation values between gamma-cycle  
824 amplitude and duration, if gamma amplitude and duration values are concatenated across all  
825 trials and time points. This would conceal the relationship between gamma-cycle amplitude and  
826 duration due to intrinsic variability, by introducing a positive or negative correlation bias for  
827 drifting gratings and uniform color surfaces, respectively.

828 We avoided these effects by using the following method: We calculated correlations between  
829 gamma-cycle amplitudes and durations across all trials, separately for each time point (at the  
830 respective sampling rate) after stimulus onset, and subsequently averaged those correlation  
831 values over time points and subsequently over recording sites. To enable this, we needed to  
832 define gamma-cycle amplitudes and durations for each time point. Therefore, each time point  
833 (relative to stimulus onset) was localized to the gamma half cycle (or full cycle), into which it fell,  
834 and it was assigned the respective amplitude and duration of that half cycle (or full cycle). For  
835 the calculation of correlations with one or multiple half-cycle (or full-cycle) lags, correlations



836 were calculated between amplitudes and durations shifted relative to each other by the  
837 corresponding number of half-cycles (or full cycles).

838 In datasets containing more than one stimulus condition, correlation coefficients were calculated  
839 separately for each condition and then averaged across conditions.

840 As mentioned in the results section, the correlation analysis used the Spearman correlation  
841 coefficient. Like in (Atallah and Scanziani, 2009), we found results to be essentially identical for  
842 Spearman and Pearson correlation, when using their method of determining gamma amplitude  
843 and duration. For the rest of our analyses, we used exclusively the Spearman correlation  
844 coefficient.

### 845 **Statistical significance of correlations**

846 The statistical significance of correlations between gamma-cycle amplitudes and durations was  
847 assessed by means of a non-parametric randomization approach: The order of valid duration  
848 values was randomly shuffled across trials, separately for each time-point. We then calculated  
849 surrogate Spearman's correlation coefficients 1000 times as described above for each dataset.  
850 Next, we performed a fit of a Gaussian distribution on the 1000 surrogate correlation  
851 coefficients. Empirical correlations were deemed significant if they were 3 standard deviations  
852 larger or smaller than the mean of the surrogate distribution. This procedure implements a non-  
853 parametric version of a two-sided test with a p-value of  $\approx 0.001$ .

854 To test if the mean correlation of gamma-cycle amplitudes and durations is significantly different  
855 from zero across datasets, we applied a Student's t-test. In general, we prefer non-parametric  
856 randomization tests over parametric tests (like the t-test). However, some analyses contained  
857 only four or five datasets, which effectively precludes the application of non-parametric tests.  
858 Where possible, we supplemented the t-test with a non-parametric statistical test (Figures 2C,  
859 4A, 4B and S1A). Specifically, we calculated the mean correlation across datasets for each  
860 possible combination of values that results after independently inverting or maintaining the sign  
861 of each correlation value (i.e. a full permutation). This led to a surrogate distribution of mean  
862 values to which the empirical mean was compared for statistical significance. Mean correlations  
863 were deemed significant if they were larger (smaller) than the top (bottom) 2.5 percentile of this  
864 surrogate distribution.

### 865 **Regression analysis**

866 We performed regression analyses separately for gamma-cycle amplitudes and durations with  
867 the Matlab function *regress*. As explained in the results section, for each half-cycle, we  
868 regressed the amplitude value of the ongoing half-cycle against the amplitude values of the  
869 previous and next half-cycle, by using a least squares approach. We used the same procedure  
870 for half-cycle duration values. This was done for each point after stimulus onset separately, and  
871 by using all the amplitude and duration values across trials (for that time point). We then  
872 calculated the regression residuals by subtracting each amplitude and duration regression  
873 vector from the corresponding amplitude and duration values, separately for each timepoint.

874 These residual values measured the extent to which the amplitude or duration in the ongoing  
875 half-cycle was greater or smaller than in the surrounding half-cycles, and thereby departed from  
876 slower trends. We then computed the correlation between the regression residuals for amplitude  
877 and duration, in the same way as described above.

## 878 **Micro-saccade detection**

879 We low-pass filtered vertical and horizontal eye position signals by replacing each value with the  
880 average over itself  $\pm 15$  ms. We then computed the first temporal derivative of the signals to  
881 obtain the vertical and horizontal velocities. We combined those values to obtain the eye speed  
882 irrespective of the direction of eye movement. Per trial, we determined the SD of eye speed,  
883 and any deviation  $>4$  SDs and lasting for at least 30 ms was deemed a saccadic eye  
884 movement. Saccadic eye movements that remained within the fixation window were considered  
885 to be MSs.

## 886 **AR**

887 In Figure S2, we computed our correlations for data generated through auto-regressive models  
888 with a power spectrum similar to the recorded LFP data. An autoregressive (AR) model of  
889 order  $n$  represents each value in a time-varying process as the linear sum of its  $n$  preceding  
890 values (each weighted by a separate coefficient) and a stochastic term. This model can then be  
891 used to generate a synthetic time series that has the same power spectrum as the original  
892 process, but that is devoid of higher-order statistical properties such as slow temporal trends or  
893 spectral cross-frequency dependencies. We modelled the LFP as an AR process of a relatively  
894 high order (50 for monkeys J and P, whose analysis was based on a sampling rate of 1000 Hz,  
895 and 100 for monkeys H, I, T, whose analysis was based on a sampling rate of 2034.51 Hz). We  
896 did this by fitting a vector of AR coefficients and a noise variance term with the Matlab function  
897 *arfit*, simultaneously to all the trials of a given stimulus condition and independently for each  
898 recording site. For our analyses, we only used the period of the trial starting at 250 ms after  
899 stimulus onset, thereby omitting stimulus onset-related transient activity. These AR models were  
900 then used to generate surrogate time series.

## 901 **PPC**

902 For the calculation of spike-LFP PPC, the gamma phase of each spike within a gamma cycle  
903 was defined as  $t/T * 2 * \pi$ , where  $t$  was the time of the spike relative to the start of the gamma  
904 cycle, and  $T$  was the duration of the gamma cycle. This constitutes a linear phase interpolation.  
905 This used the improved Hilbert-based definition of gamma half-cycles (cycles). The obtained  
906 spike phases from separate trials were collected, and the average consistency of phases across  
907 these pairs was estimated with the pairwise-phase-consistency metric (PPC) (Vinck et al., 2012;  
908 Vinck et al., 2010b), and more specifically its PPC1 variant (Vinck et al., 2012). Any potential  
909 bias due to differences in discharge rates is removed by the pairwise computation. Only  
910 neurons that fired at least 50 spikes were considered, because phase-locking estimates can  
911 have a high variance in cases of low spike counts. We were not able to perform this analysis for  
912 single-unit activity, due to the lack of a sufficient number of detected single unit spikes.

913 **Computation of the Cycle-Based-Spectrum (CBS) and rate-of-incidence of**  
914 **gamma-frequencies**

915 For Figure 6, we computed the cycle-based-spectrum (CBS) and the rate-of-incidence of  
916 different gamma-frequencies as follows. Gamma half-cycle amplitude and duration values were  
917 extracted from the LFP through the use of the previously described improved detection  
918 algorithm. Values of gamma-half-cycle durations were converted into values of gamma-half-  
919 cycle frequency (frequency being the inverse of duration). This was done separately for each  
920 recording site and stimulus condition. Next, gamma half cycles were assigned to their  
921 corresponding frequency bin, and for each frequency bin, the average amplitude and the rate of  
922 incidence of that frequency were determined.

923 Note that the peak gamma-frequency varies across experimental subjects and stimulus  
924 conditions. In order to compute averages across stimulus conditions and monkeys, it is  
925 therefore necessary to align individual distributions to the power-spectral peak in the gamma-  
926 frequency-range, separately for each stimulus condition and dataset. We performed this  
927 alignment in the following way: The raw trial-wise power spectra were estimated separately for  
928 each stimulus condition as described above (see power), and from these spectra we determined  
929 the peak gamma-frequency. In addition, this was done for the baseline-corrected power spectra.  
930 The alignment of half-cycle amplitudes and frequency counts was then performed around the  
931 resulting frequency. Specifically, half-cycle amplitude and frequency count averages at  $\pm 20$  Hz  
932 around the gamma peak were averaged across stimulus conditions and datasets. Note that we  
933 analyzed datasets with different sampling rates. This entailed that the range of detectable half-  
934 cycle frequencies (i.e.  $\text{sampling rate}/(2 \cdot \text{duration})$ ) varied across different datasets and,  
935 depending on the sampling rate, certain frequency bins were necessarily empty. In order to  
936 average across datasets with different sampling rates, we therefore performed a linear  
937 interpolation between normalized half-cycle amplitude values and frequency counts, which were  
938 adjacent to empty bins.

## 939 Legends

940 **Fig. 1. Gamma dynamics in monkey V1 during visual stimulation.** (A) Raw LFP trace from  
941 one representative recording site from area V1 in monkey T before and during the presentation  
942 of a full-screen drifting grating. (B and C) Raw power (B) and power change relative to baseline  
943 (C), averaged across all selected recording sites from V1 in monkey T. The green and black  
944 traces in (B) correspond to the pre-stimulus baseline period and stimulation period respectively.  
945 The error regions show 2 standard errors of the mean (S.E.M.) based on a bootstrap procedure  
946 across trials (1000 bootstraps). (D) Power change relative to baseline, as function of frequency  
947 and time relative to stimulus onset, averaged over all selected V1 recording sites in monkey T  
948 before and during the presentation of a full-screen drifting grating. Note the changes in gamma  
949 amplitude and frequency with time after stimulus onset. (E) Time course of gamma-half-cycle  
950 amplitude (blue) and duration (red), averaged over all selected V1 recording sites in monkey T  
951 during the presentation of a full-screen drifting grating. The error regions show  $\pm 2$  SEM based  
952 on a bootstrap procedure. Only the stimulation period is shown, because only very few gamma  
953 cycles of very low amplitude were detected before stimulus onset. (F-J) Same as A-E, but for  
954 the presentation of a full-screen uniform color surface. (A, D, F, I) Dashed lines indicate stimulus  
955 onset.

956 **Fig. 2. Estimation of correlation between gamma-cycle amplitude and duration can be**  
957 **influenced by noise.** (A) Representative LFP trace filtered in the gamma range (20-100 Hz).  
958 Red dots indicate local maxima and minima. (B) Initial segment of the trace in (A) demonstrating  
959 the definition of gamma-cycle amplitude and gamma-cycle inter-event interval (IEI), which we  
960 refer to as duration. (C) For each dataset listed on the x-axis, the three bars show the  
961 correlation between gamma-cycle amplitudes and the durations of the same gamma cycle  
962 (center, red), the previous gamma cycle (left, white) and the next gamma cycle (right, white). On  
963 the right, this is shown for the average across all datasets. This was calculated for the period  
964 during the presentation of the visual stimulus. Amplitude and duration values were extracted as  
965 in (Atallah and Scanziani, 2009) for data from awake freely-moving rats. This includes the  
966 filtering illustrated in (A, B); note that the employed subtraction of a boxcar-smoothed signal  
967 amounts to a high-pass-filtering at 20 Hz (see Methods for details). For each individual dataset,  
968 a null distribution was produced by randomizing the order of duration values across trials, and  
969 the resulting means and 99.9% confidence intervals are shown as dots and vertical lines (all  
970 very close to the zero line). For the average across datasets, shown on the right, we performed  
971 a t-test and show the resulting confidence intervals as vertical lines on the observed mean. (D)  
972 Same as (C) but for the pre-stimulus baseline. (E) Example synthetic colored noise trace filtered  
973 in the gamma range (20-100 Hz). Red dots indicate local maxima and minima. (F) Power  
974 spectra of synthetic colored noise signals with a spectral shape of  $1/f^n$ , with  $n$  assuming values  
975 from 0 (dark blue) to 2 (bright yellow). (G) Correlation of the amplitude and duration of individual  
976 deflections in synthetic colored noise signals. Dots and vertical lines indicate means  $\pm 2$  SEM  
977 produced by a bootstrap procedure (1000 bootstraps). The color conventions are the same as in  
978 (F).

979 **Fig. 3. Illustration of a method for the selection of gamma-oscillatory epochs.** (A) LFP  
980 trace displayed in Figure 1A, with regions presented in red corresponding to gamma epochs  
981 passing the criterion for stationarity. (B) Phase of the analytic signal based on the Hilbert  
982 transform of the trace shown in A. (C) Angular velocity of A. Note periods of positive and  
983 relatively stable angular velocity, corresponding to oscillatory gamma epochs in the original  
984 LFP. (A-C) Dashed lines indicate stimulus onset. (D) Magnification of the designated section of  
985 the LFP trace and its phase. Red dots indicate detected LFP peaks and troughs. Vertical  
986 dashed lines designate negative-to-positive and positive-to-negative zero crossings of the  
987 phase of the analytic signal, whereas horizontal dashed lines designate 0.

988 **Fig. 4. Gamma-half-cycle amplitudes and durations are positively correlated in gamma-**  
989 **oscillatory epochs.** (A) For each dataset listed on the x-axis, the three bars show the  
990 correlation between the amplitude of a gamma half cycle and the duration of the same gamma  
991 half cycle (center, red), previous gamma half cycle (left, white) and next gamma half cycle (right,  
992 white). On the right, this is shown for the average across all datasets. This was calculated for  
993 each time-point across trials and averaged across time-points for gamma-oscillatory epochs.  
994 The data used correspond to the period during the presentation of the visual stimulus. For each  
995 individual dataset, a null distribution was produced by randomizing the order of duration values  
996 across trials, and the resulting means and 99.9% confidence intervals are shown as dots and  
997 vertical lines. For the average across datasets, shown on the right, we performed a t-test and  
998 show the resulting confidence intervals as vertical lines on the observed mean. (B) Correlation  
999 between the amplitude of a gamma half-cycle and the duration of gamma half-cycles before and  
1000 after it for 3 different datasets. Note that in monkey I, this is limited to  $\pm 2$  cycles, because the  
1001 signal-to-noise ratio was lower, resulting in shorter gamma-oscillatory epochs. Importantly, all  
1002 three example datasets show a central peak, despite the fact that they show different longer-  
1003 term correlations, including a relatively broad peak in the middle trace and a relatively broad  
1004 trough in the right trace. The gray lines and gray-shaded areas depict the means and  
1005 99.9% confidence regions, after randomizing the order of duration values across trials.  
1006 (C) Same as A, but showing the correlations between residuals of the regression across  
1007 adjacent amplitude triplets and the residuals of the regression across adjacent duration triplets.

1008 **Fig 5. The effect of MSs on the correlation between gamma-half-cycle amplitudes and**  
1009 **durations.** (A) Time-frequency power averaged over all selected V1 recording sites in monkey  
1010 T during the presentation of a full-screen drifting grating, normalized by the pre-stimulus  
1011 baseline. X-axis shows time relative to detected microsaccades (MSs). (B) Time-course of the  
1012 gamma-half-cycle amplitude (blue) and duration (red) of the data depicted in A. Error regions  
1013 show  $\pm 2$  SEM based on a bootstrap over MSs. (C) Same as Figure 4C, but after the removal of  
1014 250 ms epochs following the occurrence of MSs for all available datasets.

1015 **Fig 6. Cycle-based spectra of amplitudes and rates of incidence.** (A) The x-axis shows  
1016 duration expressed as its inverse, namely frequency, and after aligning to the gamma peak in  
1017 the raw power spectrum (black trace). The blue curve shows the gamma-half-cycle amplitudes  
1018 as a function of their duration. The red curve shows the count of detected gamma half-cycles as



1019 a function of their duration. These analyses were based on the broadband signal from the last  
1020 250 ms of stimulation (see Methods). Error regions show  $\pm 2$  SEM based on a bootstrap  
1021 procedure. (B) Same as A, but after aligning to the peak in the power change spectrum. (C)  
1022 Same as A, and (D) same as B, but for gamma epochs detected on the filtered LFP.

1023 **Fig 7. The relationship between gamma-cycle duration and spiking.** (A) The blue curve  
1024 depicts the average normalized multi-unit (MU) spike count in detected gamma cycles of  
1025 different durations, expressed on the x-axis as frequencies, for monkey J (left) and monkey L  
1026 (right). The black curve depicts raw power in the gamma range of the respective monkeys. Error  
1027 regions show  $\pm 2$  SEM across units. (B) Same as A, but using the normalized MU firing rate. (C)  
1028 Same as A, but showing the normalized change in spike-LFP PPC. (D) Correlation between the  
1029 gamma-cycle duration, expressed as frequency, and several spiking metrics, separately for the  
1030 two monkeys (J and L). Vertical lines depict  $\pm 2$  SEM across units.

1031 **Fig 8. The modulation of spiking activity by the phase of the gamma cycle.** (A) The color  
1032 shows the modulation of the MU firing rate as a function of gamma-cycle duration (y-axis) and  
1033 the phase in the gamma cycle, at which spikes occurred (x-axis). (B) Difference in normalized  
1034 firing rate between short and long gamma cycles for the preferred (left bar) and non-preferred  
1035 phase in gamma cycles (right bar). Vertical lines depict  $\pm 2$  SEM across units. Data from  
1036 monkey J and monkey L are shown in the left and right column, respectively.

1037 **Fig. S1. Gamma-full-cycle amplitudes and durations are positively correlated.** (A) Same as  
1038 Figure 4A, but using full gamma cycles. (B) Same as Figure 4C, but using full gamma cycles.  
1039 (C) Same as Figure S2E, but using full gamma cycles. (D) Same as Figure 5C, but using full  
1040 gamma cycles.

1041 **Fig. S2. Correlation of gamma-half-cycle amplitudes and durations in an AR model of the**  
1042 **visual stimulation period.** Panels (A-D) are based on signals generated by an autoregressive  
1043 (AR) model of the data used in Figures 1A-1D, stimulation period, averaged over all selected V1  
1044 sites. We refer to the synthetic LFP signal generated by the AR model as AR-based LFP.  
1045 (A) Representative AR-based LFP. Regions presented in red correspond to gamma epochs  
1046 passing the criterion for stationarity. (B) Average raw power of the measured (black) and the  
1047 AR-based LFP (green). (C) Time-frequency power of AR-based LFP. Note the expected  
1048 absence of temporal trends. (D) Time-course of gamma-half-cycle amplitude (blue) and duration  
1049 (red) of AR-based LFP. Error regions show  $\pm 2$  SEM based on a bootstrap procedure. (E) Same  
1050 as Figure 4A, but for the AR-based LFP.

## References

- 1051  
1052  
1053 Akam, T.E., and Kullmann, D.M. (2012). Efficient "communication through coherence" requires  
1054 oscillations structured to minimize interference between signals. *PLoS computational biology* 8,  
1055 e1002760.
- 1056 Atallah, B.V., and Scanziani, M. (2009). Instantaneous modulation of gamma oscillation  
1057 frequency by balancing excitation with inhibition. *Neuron* 62, 566-577.
- 1058 Bastos, A.M., Vezoli, J., Bosman, C.A., Schoffelen, J.M., Oostenveld, R., Dowdall, J.R., De  
1059 Weerd, P., Kennedy, H., and Fries, P. (2015). Visual areas exert feedforward and feedback  
1060 influences through distinct frequency channels. *Neuron* 85, 390-401.
- 1061 Bichot, N.P., Rossi, A.F., and Desimone, R. (2005). Parallel and serial neural mechanisms for  
1062 visual search in macaque area V4. *Science* 308, 529-534.
- 1063 Bieri, K.W., Bobbitt, K.N., and Colgin, L.L. (2014). Slow and fast gamma rhythms coordinate  
1064 different spatial coding modes in hippocampal place cells. *Neuron* 82, 670-681.
- 1065 Börgers, C., Epstein, S., and Kopell, N.J. (2008). Gamma oscillations mediate stimulus  
1066 competition and attentional selection in a cortical network model. *Proceedings of the National  
1067 Academy of Sciences of the United States of America* 105, 18023-18028.
- 1068 Börgers, C., and Kopell, N. (2003). Synchronization in networks of excitatory and inhibitory  
1069 neurons with sparse, random connectivity. *Neural computation* 15, 509-538.
- 1070 Bosman, C.A., Schoffelen, J.M., Brunet, N., Oostenveld, R., Bastos, A.M., Womelsdorf, T.,  
1071 Rubehn, B., Stieglitz, T., De Weerd, P., and Fries, P. (2012). Attentional stimulus selection  
1072 through selective synchronization between monkey visual areas. *Neuron* 75, 875-888.
- 1073 Bosman, C.A., Womelsdorf, T., Desimone, R., and Fries, P. (2009). A microsaccadic rhythm  
1074 modulates gamma-band synchronization and behavior. *The Journal of neuroscience : the  
1075 official journal of the Society for Neuroscience* 29, 9471-9480.
- 1076 Bragin, A., Jandó, G., Nádasdy, Z., Hetke, J., Wise, K., and Buzsáki, G. (1995). Gamma (40-  
1077 100 Hz) oscillation in the hippocampus of the behaving rat. *The Journal of neuroscience : the  
1078 official journal of the Society for Neuroscience* 15, 47-60.
- 1079 Branco, T., and Häusser, M. (2011). Synaptic integration gradients in single cortical pyramidal  
1080 cell dendrites. *Neuron* 69, 885-892.
- 1081 Brunet, N.M., Bosman, C.A., Vinck, M., Roberts, M., Oostenveld, R., Desimone, R., De Weerd,  
1082 P., and Fries, P. (2014). Stimulus repetition modulates gamma-band synchronization in primate  
1083 visual cortex. *Proceedings of the National Academy of Sciences of the United States of America*  
1084 111, 3626-3631.
- 1085 Burns, S.P., Xing, D., and Shapley, R.M. (2011). Is gamma-band activity in the local field  
1086 potential of V1 cortex a "clock" or filtered noise? *The Journal of neuroscience : the official  
1087 journal of the Society for Neuroscience* 31, 9658-9664.

- 1088 Buschman, T.J., and Miller, E.K. (2007). Top-down versus bottom-up control of attention in the  
1089 prefrontal and posterior parietal cortices. *Science* 315, 1860-1862.
- 1090 Buzsáki, G., and Wang, X.J. (2012). Mechanisms of gamma oscillations. *Annual review of*  
1091 *neuroscience* 35, 203-225.
- 1092 Cardin, J.A., Carlén, M., Meletis, K., Knoblich, U., Zhang, F., Deisseroth, K., Tsai, L.H., and  
1093 Moore, C.I. (2009). Driving fast-spiking cells induces gamma rhythm and controls sensory  
1094 responses. *Nature* 459, 663-667.
- 1095 Colgin, L.L., Denninger, T., Fyhn, M., Hafting, T., Bonnevie, T., Jensen, O., Moser, M.B., and  
1096 Moser, E.I. (2009). Frequency of gamma oscillations routes flow of information in the  
1097 hippocampus. *Nature* 462, 353-357.
- 1098 Csicsvari, J., Jamieson, B., Wise, K.D., and Buzsáki, G. (2003). Mechanisms of gamma  
1099 oscillations in the hippocampus of the behaving rat. *Neuron* 37, 311-322.
- 1100 Desimone, R., and Duncan, J. (1995). Neural mechanisms of selective visual attention. *Annual*  
1101 *review of neuroscience* 18, 193-222.
- 1102 Fries, P. (2015). Rhythms for Cognition: Communication through Coherence. *Neuron* 88, 220-  
1103 235.
- 1104 Fries, P., Reynolds, J.H., Rorie, A.E., and Desimone, R. (2001). Modulation of oscillatory  
1105 neuronal synchronization by selective visual attention. *Science* 291, 1560-1563.
- 1106 Gieselmann, M.A., and Thiele, A. (2008). Comparison of spatial integration and surround  
1107 suppression characteristics in spiking activity and the local field potential in macaque V1. *The*  
1108 *European journal of neuroscience* 28, 447-459.
- 1109 Gray, C.M., König, P., Engel, A.K., and Singer, W. (1989). Oscillatory responses in cat visual  
1110 cortex exhibit inter-columnar synchronization which reflects global stimulus properties. *Nature*  
1111 338, 334-337.
- 1112 Gregoriou, G.G., Gotts, S.J., Zhou, H., and Desimone, R. (2009). High-frequency, long-range  
1113 coupling between prefrontal and visual cortex during attention. *Science* 324, 1207-1210.
- 1114 Grothe, I., Neitzel, S.D., Mandon, S., and Kreiter, A.K. (2012). Switching neuronal inputs by  
1115 differential modulations of gamma-band phase-coherence. *The Journal of neuroscience : the*  
1116 *official journal of the Society for Neuroscience* 32, 16172-16180.
- 1117 Haider, B., Schulz, D.P., Häusser, M., and Carandini, M. (2016). Millisecond Coupling of Local  
1118 Field Potentials to Synaptic Currents in the Awake Visual Cortex. *Neuron* 90, 35-42.
- 1119 Hasenstaub, A., Shu, Y., Haider, B., Kraushaar, U., Duque, A., and McCormick, D.A. (2005).  
1120 Inhibitory postsynaptic potentials carry synchronized frequency information in active cortical  
1121 networks. *Neuron* 47, 423-435.
- 1122 Henrie, J.A., and Shapley, R. (2005). LFP power spectra in V1 cortex: the graded effect of  
1123 stimulus contrast. *Journal of neurophysiology* 94, 479-490.

- 1124 Jia, X., Smith, M.A., and Kohn, A. (2011). Stimulus selectivity and spatial coherence of gamma  
1125 components of the local field potential. *The Journal of neuroscience : the official journal of the*  
1126 *Society for Neuroscience* 31, 9390-9403.
- 1127 Jia, X., Tanabe, S., and Kohn, A. (2013a). gamma and the coordination of spiking activity in  
1128 early visual cortex. *Neuron* 77, 762-774.
- 1129 Jia, X., Xing, D., and Kohn, A. (2013b). No consistent relationship between gamma power and  
1130 peak frequency in macaque primary visual cortex. *The Journal of neuroscience : the official*  
1131 *journal of the Society for Neuroscience* 33, 17-25.
- 1132 Lewis, C.M., Bosman, C.A., Womelsdorf, T., and Fries, P. (2016). Stimulus-induced visual  
1133 cortical networks are recapitulated by spontaneous local and interareal synchronization.  
1134 *Proceedings of the National Academy of Sciences of the United States of America* 113, E606-  
1135 615.
- 1136 Lima, B., Singer, W., Chen, N.H., and Neuenschwander, S. (2010). Synchronization dynamics  
1137 in response to plaid stimuli in monkey V1. *Cereb Cortex* 20, 1556-1573.
- 1138 Lowet, E., Gips, B., Roberts, M.J., De Weerd, P., Jensen, O., and van der Eerden, J. (2018).  
1139 Microsaccade-rhythmic modulation of neural synchronization and coding within and across  
1140 cortical areas V1 and V2. *PLoS biology* 16, e2004132.
- 1141 Lowet, E., Roberts, M.J., Bosman, C.A., Fries, P., and De Weerd, P. (2016). Areas V1 and V2  
1142 show microsaccade-related 3-4-Hz covariation in gamma power and frequency. *The European*  
1143 *journal of neuroscience* 43, 1286-1296.
- 1144 Lowet, E., Roberts, M.J., Peter, A., Gips, B., and De Weerd, P. (2017). A quantitative theory of  
1145 gamma synchronization in macaque V1. *eLife* 6.
- 1146 Lundqvist, M., Rose, J., Herman, P., Brincat, S.L., Buschman, T.J., and Miller, E.K. (2016).  
1147 Gamma and Beta Bursts Underlie Working Memory. *Neuron* 90, 152-164.
- 1148 Mann, E.O., Suckling, J.M., Hajos, N., Greenfield, S.A., and Paulsen, O. (2005). Perisomatic  
1149 feedback inhibition underlies cholinergically induced fast network oscillations in the rat  
1150 hippocampus in vitro. *Neuron* 45, 105-117.
- 1151 Mitchell, J.F., Sundberg, K.A., and Reynolds, J.H. (2007). Differential attention-dependent  
1152 response modulation across cell classes in macaque visual area V4. *Neuron* 55, 131-141.
- 1153 Muller, L., Reynaud, A., Chavane, F., and Destexhe, A. (2014). The stimulus-evoked population  
1154 response in visual cortex of awake monkey is a propagating wave. *Nature communications* 5,  
1155 3675.
- 1156 Okun, M., and Lampl, I. (2008). Instantaneous correlation of excitation and inhibition during  
1157 ongoing and sensory-evoked activities. *Nature neuroscience* 11, 535-537.
- 1158 Onorato, I., Neuenschwander, S., Hoy, J.L., Lima, B., Rocha, S., Broggin, A.C., Uran, C.,  
1159 Spyropoulos, G., Womelsdorf, T., Fries, P., *et al.* (2019). A distinct class of bursting neurons  
1160 with strong gamma synchronization and stimulus selectivity in monkey V1. *Neuron* (in press).

- 1161 Oostenveld, R., Fries, P., Maris, E., and Schoffelen, J.M. (2011). FieldTrip: Open source  
1162 software for advanced analysis of MEG, EEG, and invasive electrophysiological data.  
1163 Computational intelligence and neuroscience 2011, 156869.
- 1164 Palmigiano, A., Geisel, T., Wolf, F., and Battaglia, D. (2017). Flexible information routing by  
1165 transient synchrony. Nature neuroscience 20, 1014-1022.
- 1166 Pesaran, B., Pezaris, J.S., Sahani, M., Mitra, P.P., and Andersen, R.A. (2002). Temporal  
1167 structure in neuronal activity during working memory in macaque parietal cortex. Nature  
1168 neuroscience 5, 805-811.
- 1169 Peter, A., Uran, C., Klon-Lipok, J., Roese, R., van Stijn, S., Barnes, W., Dowdall, J.R., Singer,  
1170 W., Fries, P., and Vinck, M. (2019). Surface color and predictability determine contextual  
1171 modulation of V1 firing and gamma oscillations. eLife 8.
- 1172 Ray, S., and Maunsell, J.H. (2010). Differences in gamma frequencies across visual cortex  
1173 restrict their possible use in computation. Neuron 67, 885-896.
- 1174 Reynolds, J.H., Chelazzi, L., and Desimone, R. (1999). Competitive mechanisms subserve  
1175 attention in macaque areas V2 and V4. The Journal of neuroscience : the official journal of the  
1176 Society for Neuroscience 19, 1736-1753.
- 1177 Roberts, M.J., Lowet, E., Brunet, N.M., Ter Wal, M., Tiesinga, P., Fries, P., and De Weerd, P.  
1178 (2013). Robust gamma coherence between macaque V1 and V2 by dynamic frequency  
1179 matching. Neuron 78, 523-536.
- 1180 Rohenkohl, G., Bosman, C.A., and Fries, P. (2018). Gamma Synchronization between V1 and  
1181 V4 Improves Behavioral Performance. Neuron 100, 953-963 e953.
- 1182 Rubehn, B., Bosman, C., Oostenveld, R., Fries, P., and Stieglitz, T. (2009). A MEMS-based  
1183 flexible multichannel ECoG-electrode array. Journal of neural engineering 6, 036003.
- 1184 Salkoff, D.B., Zagha, E., Yüzgeç, O., and McCormick, D.A. (2015). Synaptic Mechanisms of  
1185 Tight Spike Synchrony at Gamma Frequency in Cerebral Cortex. The Journal of neuroscience :  
1186 the official journal of the Society for Neuroscience 35, 10236-10251.
- 1187 Schmitzer-Torbert, N., Jackson, J., Henze, D., Harris, K., and Redish, A.D. (2005). Quantitative  
1188 measures of cluster quality for use in extracellular recordings. Neuroscience 131, 1-11.
- 1189 Shirhatti, V., and Ray, S. (2018). Long-wavelength (reddish) hues induce unusually large  
1190 gamma oscillations in the primate primary visual cortex. Proceedings of the National Academy  
1191 of Sciences of the United States of America 115, 4489-4494.
- 1192 Shu, Y., Hasenstaub, A., and McCormick, D.A. (2003). Turning on and off recurrent balanced  
1193 cortical activity. Nature 423, 288-293.
- 1194 Siegle, J.H., Pritchett, D.L., and Moore, C.I. (2014). Gamma-range synchronization of fast-  
1195 spiking interneurons can enhance detection of tactile stimuli. Nature neuroscience 17, 1371-  
1196 1379.



- 1197 Tiesinga, P., and Sejnowski, T.J. (2009). Cortical enlightenment: are attentional gamma  
1198 oscillations driven by ING or PING? *Neuron* 63, 727-732.
- 1199 Tiesinga, P.H., Fellous, J.M., Jose, J.V., and Sejnowski, T.J. (2001). Computational model of  
1200 carbachol-induced delta, theta, and gamma oscillations in the hippocampus. *Hippocampus* 11,  
1201 251-274.
- 1202 Traub, R.D., Jefferys, J.G., and Whittington, M.A. (1997). Simulation of gamma rhythms in  
1203 networks of interneurons and pyramidal cells. *Journal of computational neuroscience* 4, 141-  
1204 150.
- 1205 Traub, R.D., Whittington, M.A., Colling, S.B., Buzsáki, G., and Jefferys, J.G. (1996). Analysis of  
1206 gamma rhythms in the rat hippocampus in vitro and in vivo. *The Journal of physiology* 493 ( Pt  
1207 2), 471-484.
- 1208 Vinck, M., Battaglia, F.P., Womelsdorf, T., and Pennartz, C. (2012). Improved measures of  
1209 phase-coupling between spikes and the Local Field Potential. *Journal of computational*  
1210 *neuroscience* 33, 53-75.
- 1211 Vinck, M., and Bosman, C.A. (2016). More Gamma More Predictions: Gamma-Synchronization  
1212 as a Key Mechanism for Efficient Integration of Classical Receptive Field Inputs with Surround  
1213 Predictions. *Frontiers in systems neuroscience* 10, 35.
- 1214 Vinck, M., Lima, B., Womelsdorf, T., Oostenveld, R., Singer, W., Neuenschwander, S., and  
1215 Fries, P. (2010a). Gamma-phase shifting in awake monkey visual cortex. *The Journal of*  
1216 *neuroscience : the official journal of the Society for Neuroscience* 30, 1250-1257.
- 1217 Vinck, M., van Wingerden, M., Womelsdorf, T., Fries, P., and Pennartz, C.M. (2010b). The  
1218 pairwise phase consistency: A bias-free measure of rhythmic neuronal synchronization.  
1219 *NeuroImage* 51, 112-122.
- 1220 Vinck, M., Womelsdorf, T., Buffalo, E.A., Desimone, R., and Fries, P. (2013a). Attentional  
1221 modulation of cell-class-specific gamma-band synchronization in awake monkey area V4.  
1222 *Neuron* 80, 1077-1089.
- 1223 Vinck, M., Womelsdorf, T., and Fries, P. (2013b). Gamma oscillations and information  
1224 transmission. In *Principles of Neural Coding*  
1225 R.Q. Quiroga, and S. Panzeri, eds. (CRC Press).
- 1226 Wang, P., and Nikolić, D. (2011). An LCD Monitor with Sufficiently Precise Timing for Research  
1227 in Vision. *Frontiers in human neuroscience* 5, 85.
- 1228 Wehr, M., and Zador, A.M. (2003). Balanced inhibition underlies tuning and sharpens spike  
1229 timing in auditory cortex. *Nature* 426, 442-446.
- 1230 Whittington, M.A., Traub, R.D., and Jefferys, J.G. (1995). Synchronized oscillations in  
1231 interneuron networks driven by metabotropic glutamate receptor activation. *Nature* 373, 612-  
1232 615.
- 1233 Whittington, M.A., Traub, R.D., Kopell, N., Ermentrout, B., and Buhl, E.H. (2000). Inhibition-  
1234 based rhythms: experimental and mathematical observations on network dynamics.

- 1235 International journal of psychophysiology : official journal of the International Organization of  
1236 Psychophysiology 38, 315-336.
- 1237 Womelsdorf, T., and Fries, P. (2007). The role of neuronal synchronization in selective attention.  
1238 Current opinion in neurobiology 17, 154-160.
- 1239 Womelsdorf, T., Lima, B., Vinck, M., Oostenveld, R., Singer, W., Neuenschwander, S., and  
1240 Fries, P. (2012). Orientation selectivity and noise correlation in awake monkey area V1 are  
1241 modulated by the gamma cycle. Proceedings of the National Academy of Sciences of the United  
1242 States of America 109, 4302-4307.
- 1243 Zheng, C., Bieri, K.W., Hsiao, Y.T., and Colgin, L.L. (2016). Spatial Sequence Coding Differs  
1244 during Slow and Fast Gamma Rhythms in the Hippocampus. Neuron 89, 398-408.  
1245  
1246

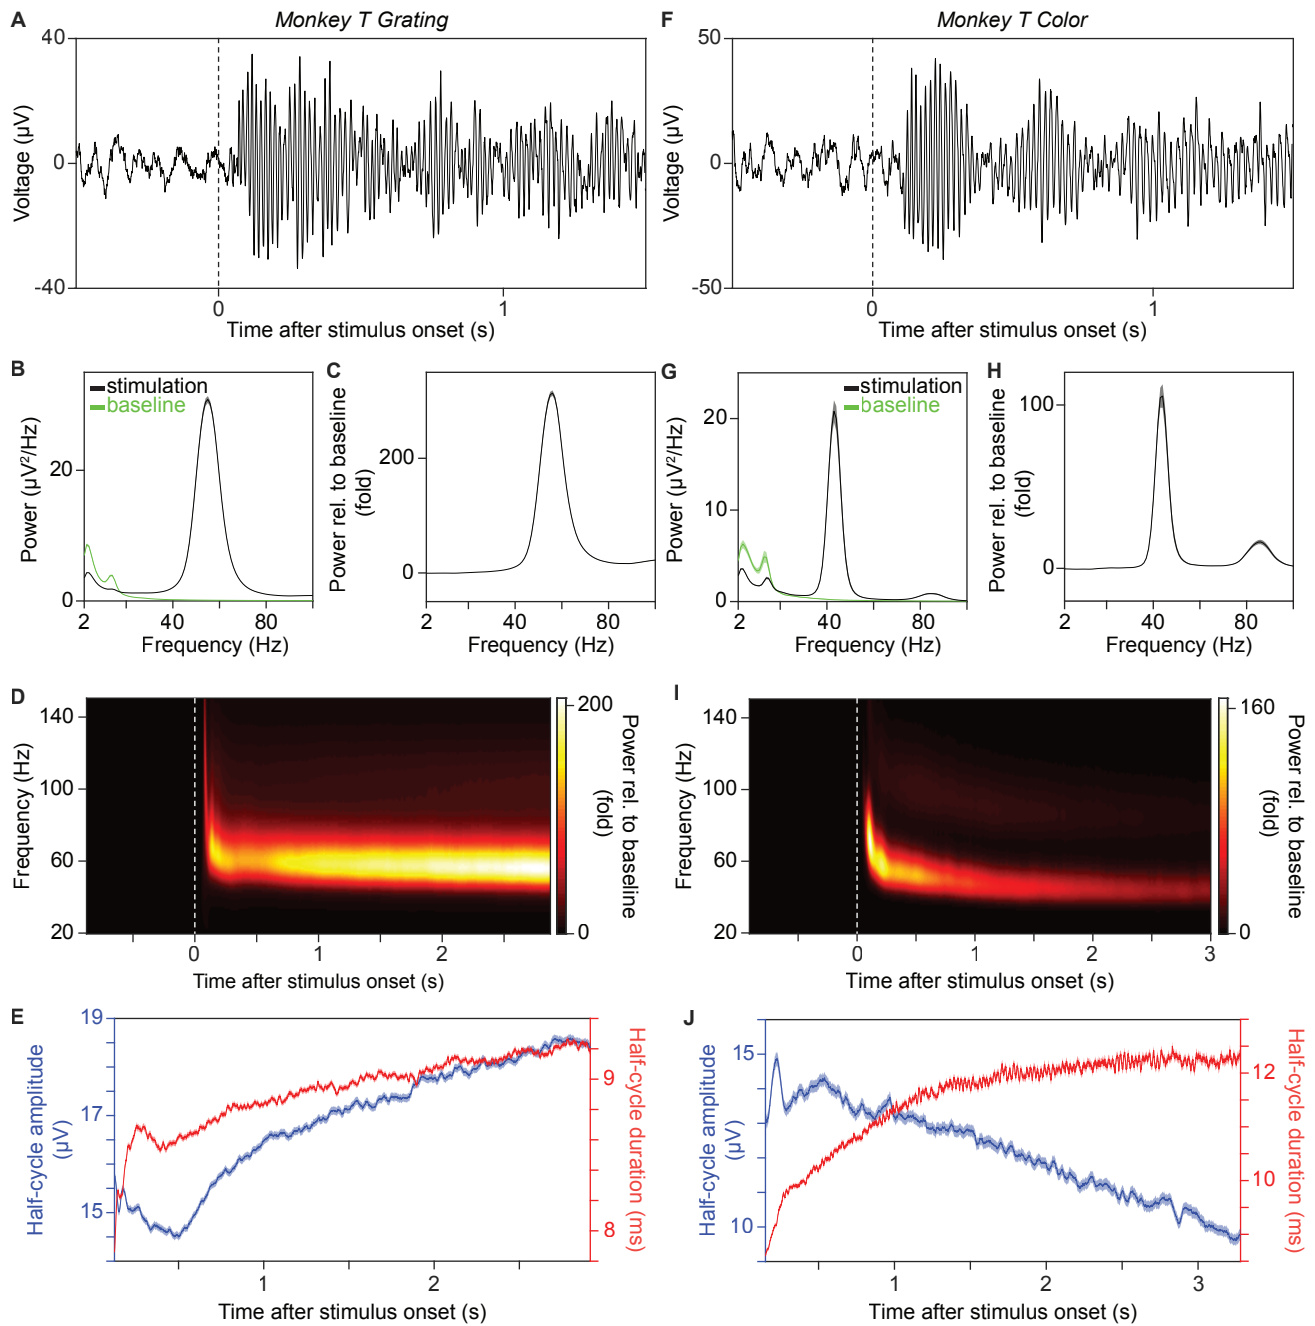

Figure 1

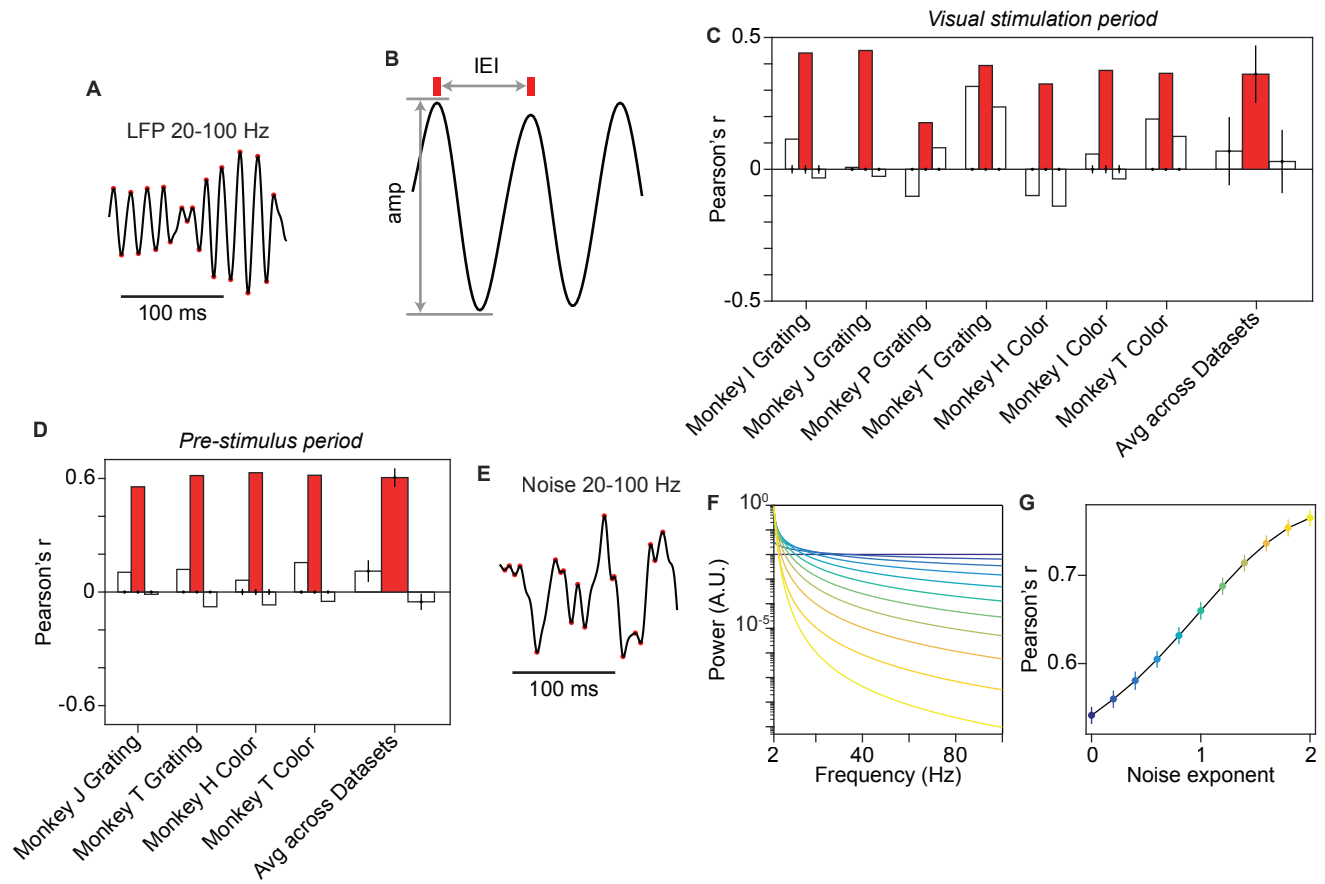

Figure 2

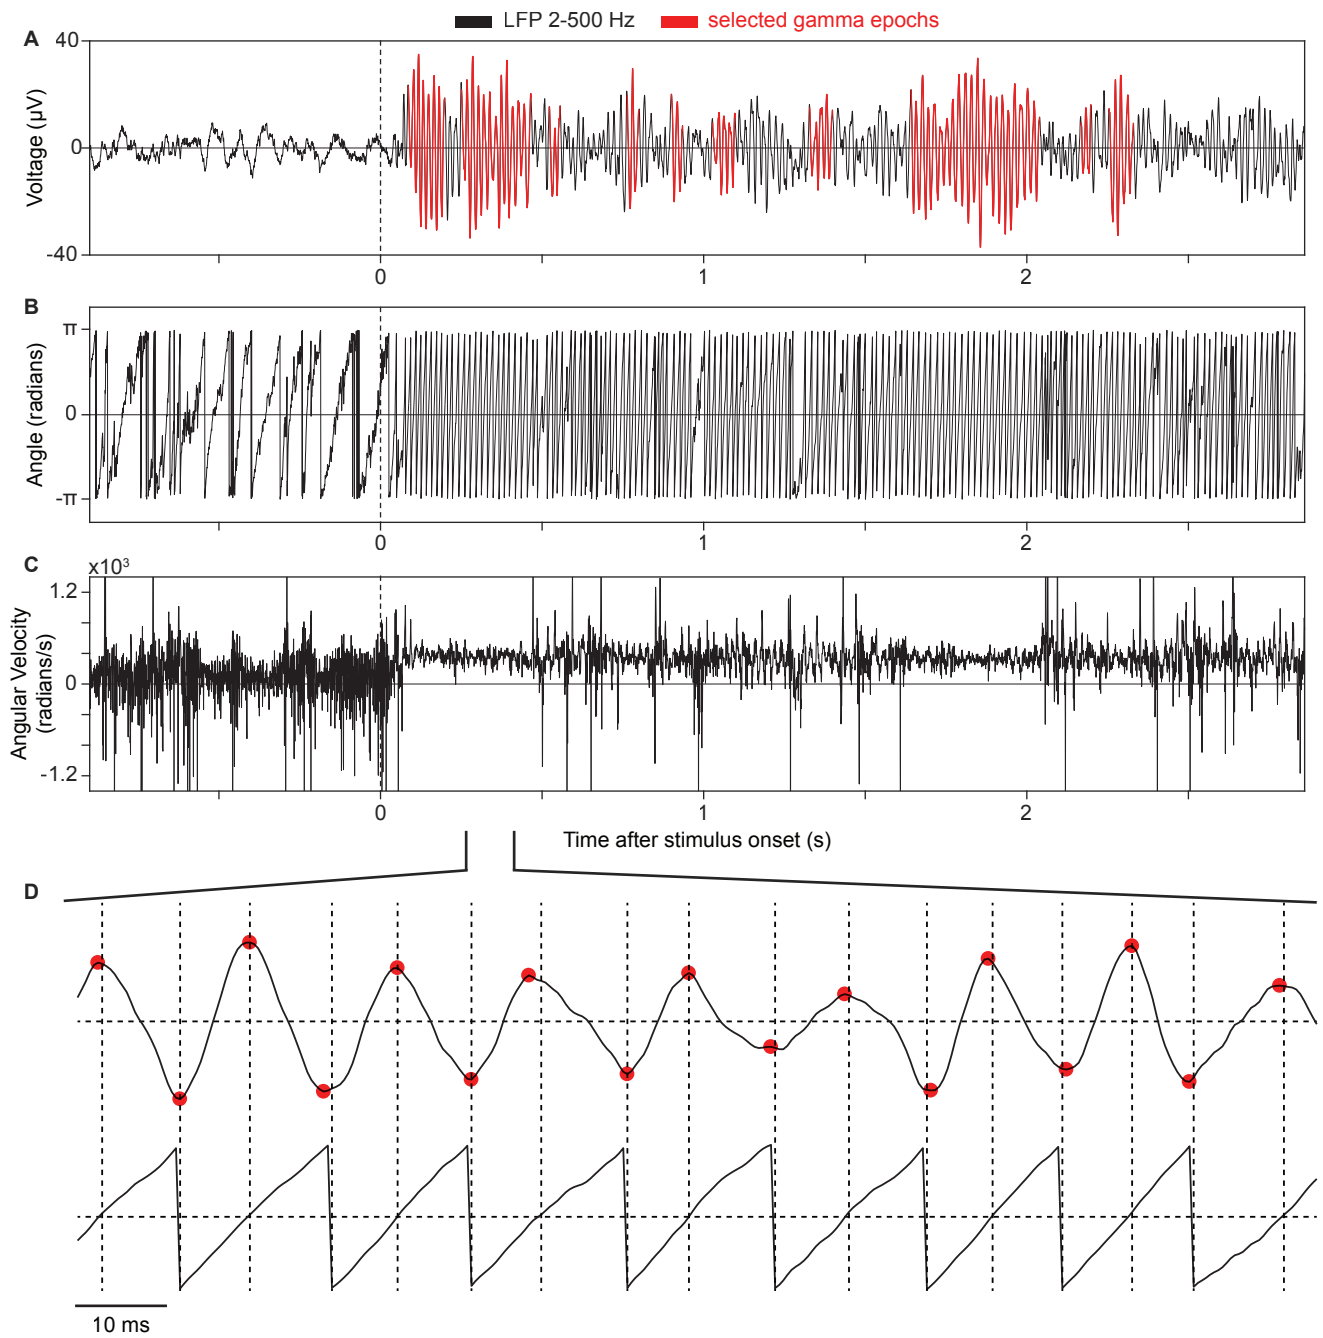

Figure 3



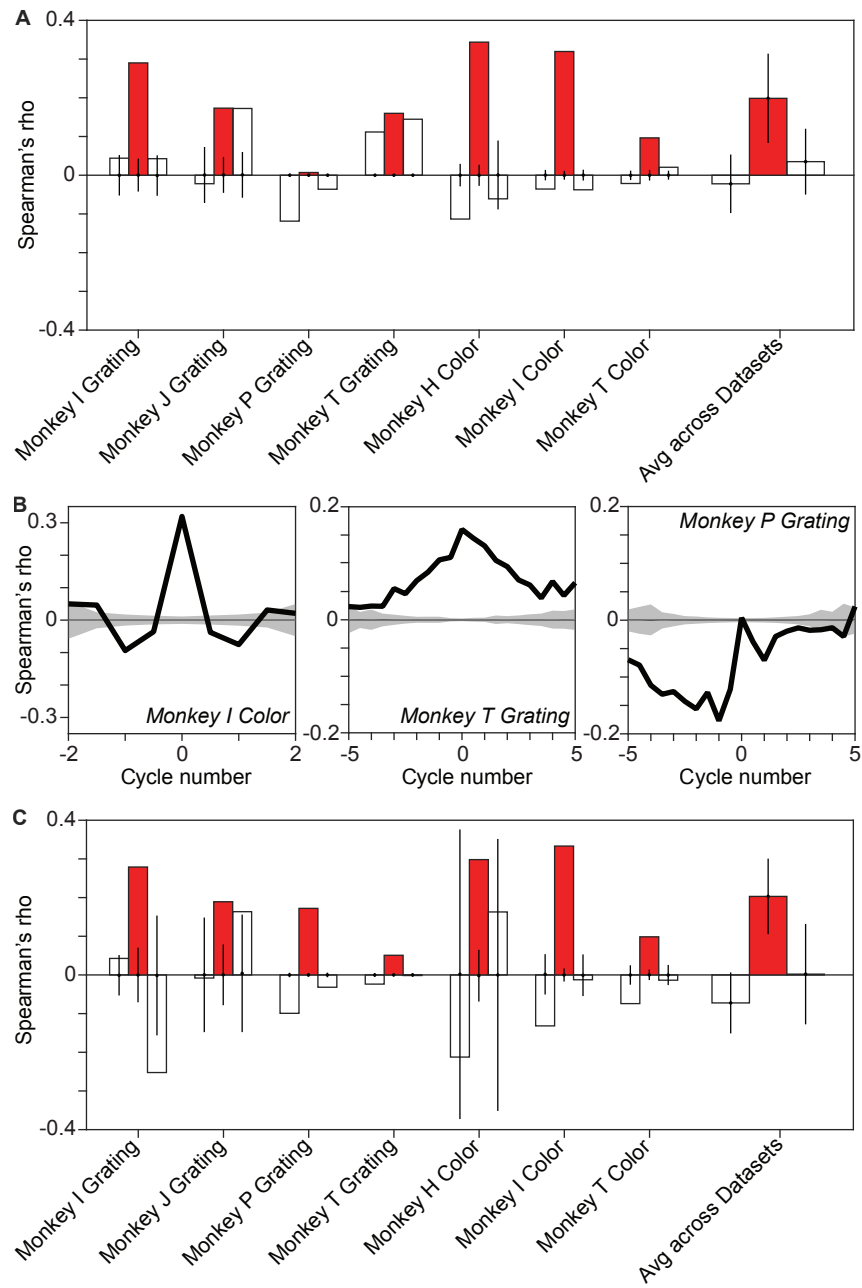

Figure 4

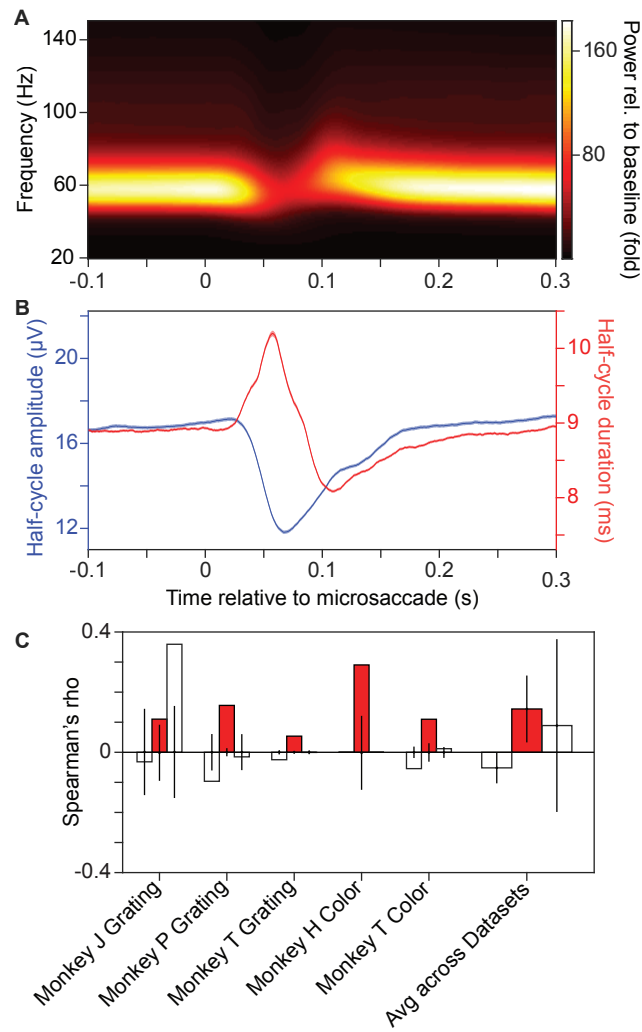

Figure 5

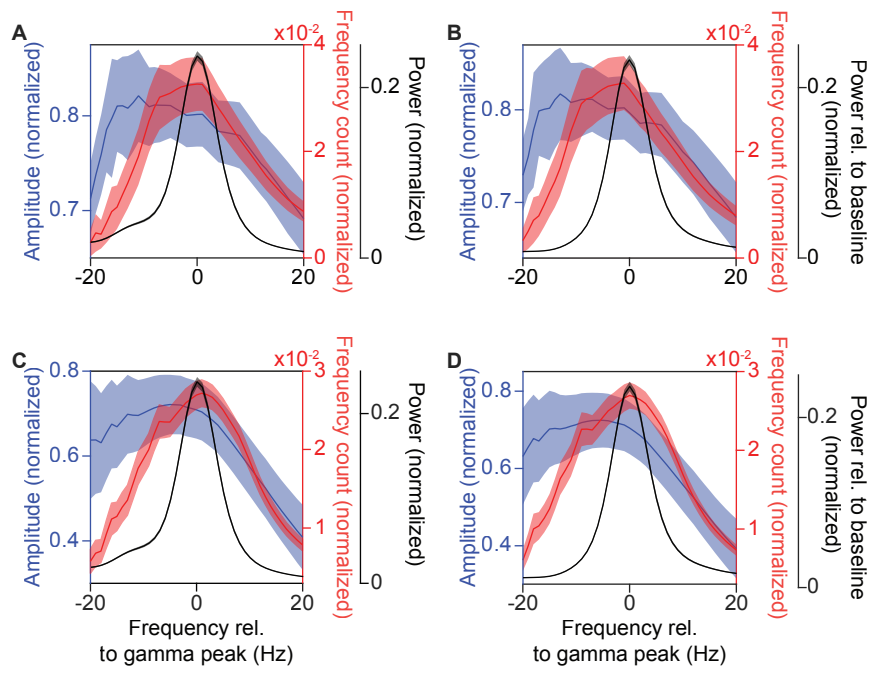

Figure 6

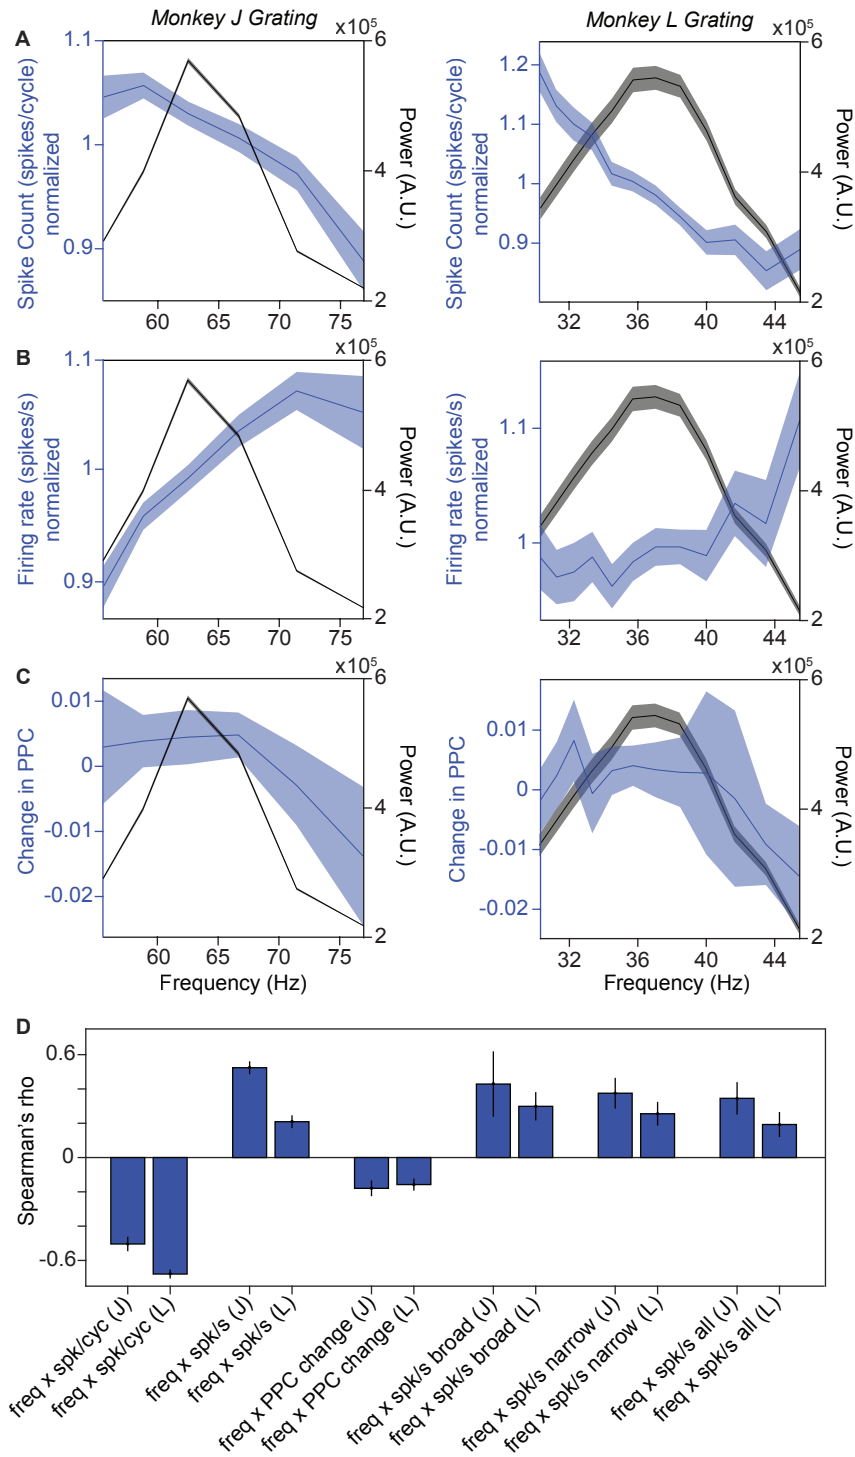

Figure 7

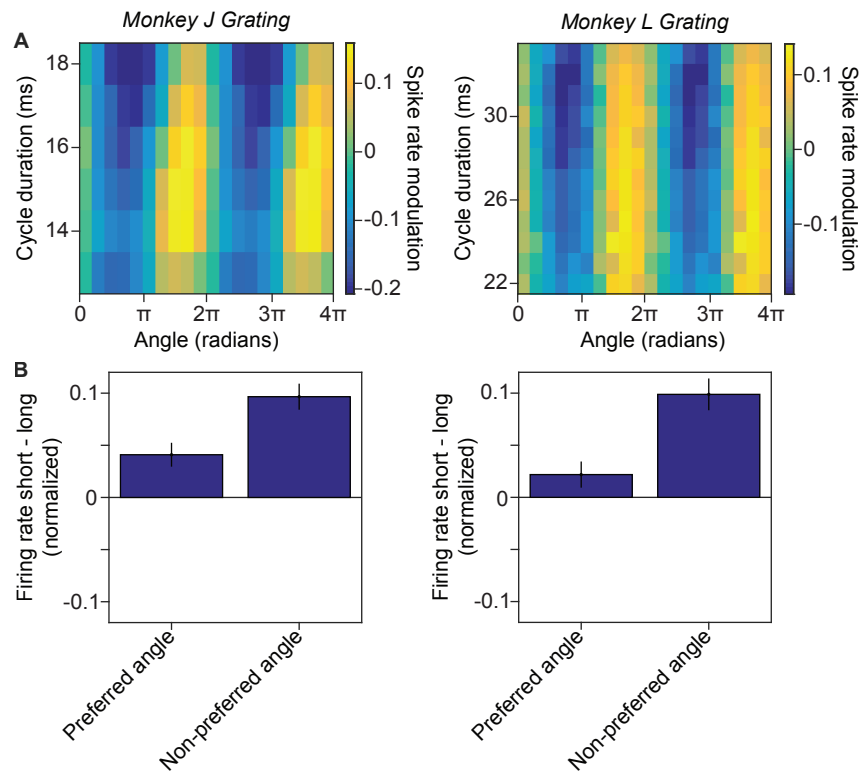

Figure 8



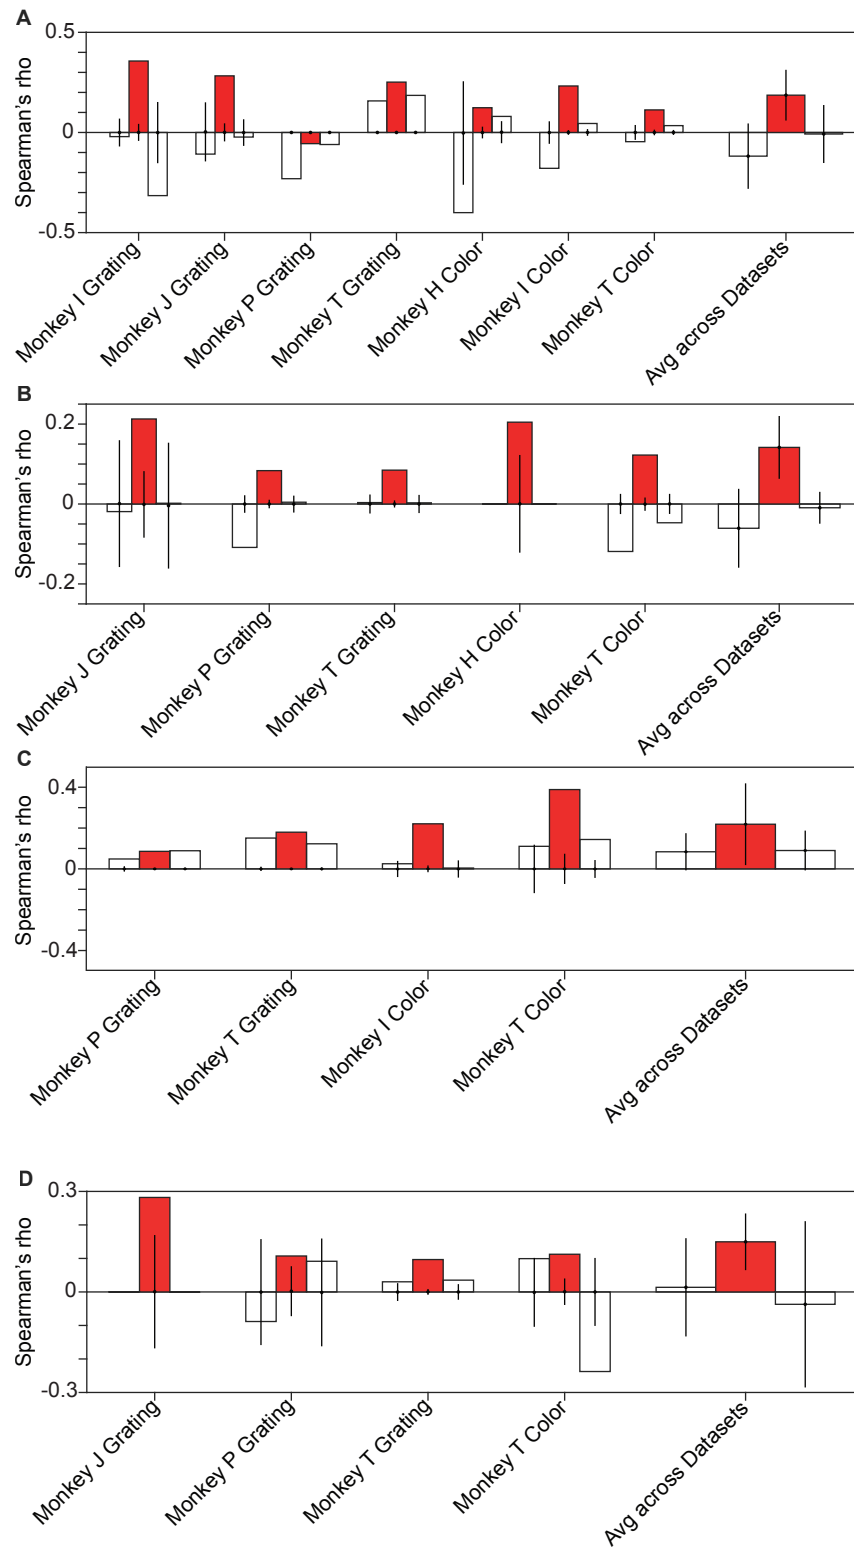

Supplementary Figure 1

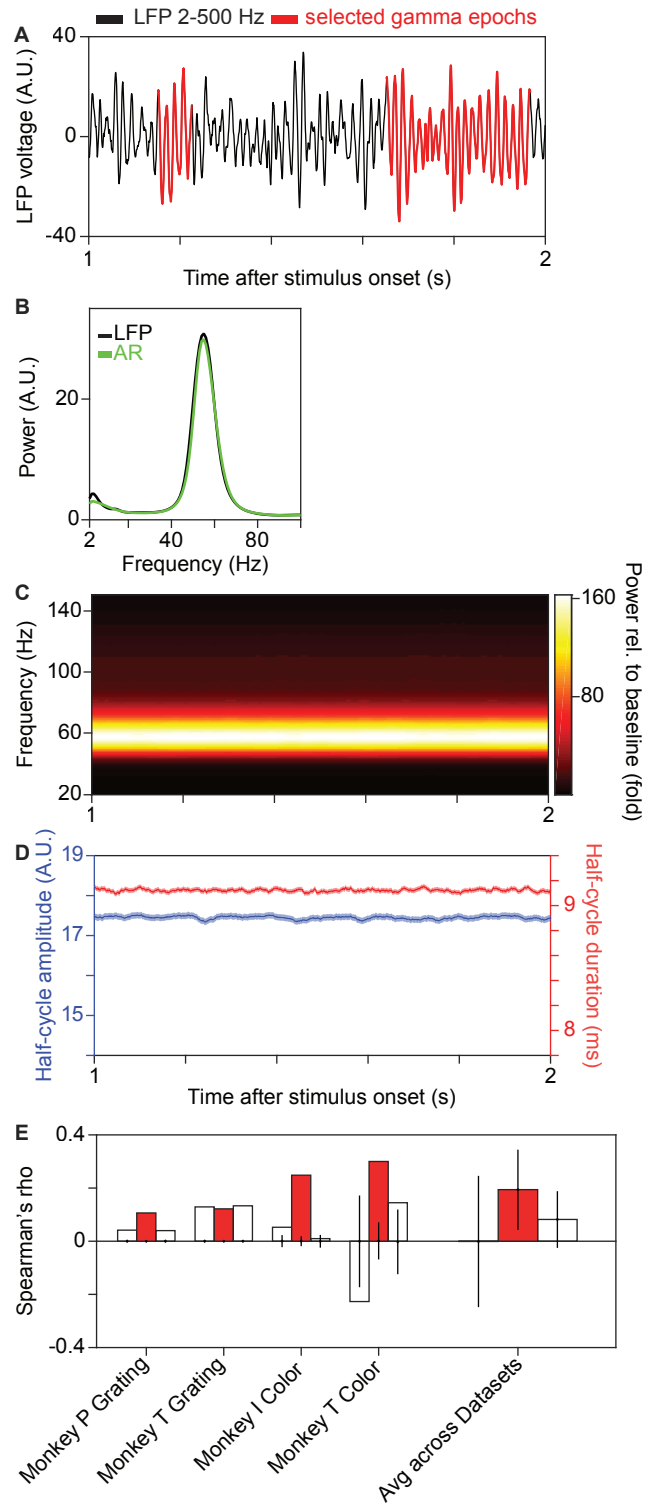

Supplementary Figure 2
